# Supplementary material for: Freshwater fish fauna of rivers in the southern Western Ghats, India
Source: Copernicus journal article supplement (doi:10.5194/essd-2017-118), 2017-11-01
Supplement: Supplementary file [file essd-2017-118-AC1-supplement.pdf]

# FRESHWATER FISH FAUNA OF RIVERS OF SOUTHERN WESTERN GHATS, INDIA

Anbu Aravazhi Arunkumar<sup>1</sup>, Arunachalam Manimekalan<sup>2</sup>

<sup>1</sup>Department of Biotechnology, Karpagam Academy of Higher Education, Coimbatore 641 021.

Tamil Nadu, India

<sup>2</sup>Department of Environmental Sciences, Biodiversity and DNA Barcoding Lab, Bharathiar University, Coimbatore 641 046, Tamil Nadu, India.

Correspondence to: Anbu Aravazhi Arunkumar ([anbu.arunkumar@gmail.com](mailto:anbu.arunkumar@gmail.com))  
<https://doi.org/10.1594/PANGAEA.882214>

**Abstract.** We studied the freshwater fish fauna of Rivers of Southern Western Ghats for a period of three years from 2010 to 2013. We recorded 64 species belonging to 6 orders, 14 families and 31 genera. Alteration in the micro and macro habitats in the system severely affects the aquatic life especially fishes and also complicates the fish taxonomy. In the present study a total of 31 sites of six river systems of Southern Western Ghats were studied in which a total of 64 species belonging to 6 orders, 14 families and 31 genera were recorded. Among the 64 species *Cyprinidae* was the dominant family with 3 families 18 genus and 49 species (76.6%) compared to other order and families, further the data analyses suggested that species belonging to the order Cypriniformes were found to be the dominant species in the locations considered in the present survey. Interestingly, among the 31 sites Thunakadavu stream, Gulithuraipatti, Athirappalli, Naduthotam, Nadathittu, Mullaitodu, Thonanthikla, Noolpuzha and Sinnaru exhibited high variations in species abundance and as well species richness. Fifteen out of the 64 fish species endangered to the Western Ghats. *Garra periyarensis* and *Cirrhinus cirrhosus* are known to be vulnerable and *Hemibagrus punctatus* is Critically Endangered because of various anthropogenic activities. The significances of the study and timely measures needed to protect the species have also been concisely discussed.

**Keywords:** Southern Western Ghats, Water Quality, Species Diversity, Endemics, threats, Conservation.

## 1. INTRODUCTION

The Western Ghats of India has a rich freshwater fish fauna with a high level of endemism (Dahanukar *et al.*, 2004). However, current knowledge of the threats faced by Western Ghats fishes suggests that a major part of this fauna is threatened by human activities and invasive alien fish species (Dahanukar *et al.*, 2004). Thus, knowledge of the diversity and distribution of the fish fauna is essential for designing and implementing conservation strategies. However, data on the fish fauna of the Western Ghats have limitations as most of the rivers have not been surveyed extensively and checklists for individual rivers are not available. In the present study we document the freshwater fish fauna of the the long and meandering eastward flowing river systems of

38 Southern Western Ghats, especially from Bhavani River System, Moyar River System, Chalakudy River System,  
39 Periyar River System, Cauvery River System and Nugu River System, in the southern region of the Western  
40 Ghats.

41 History of the Indian freshwater fishes is way back to Hamilton (1822) on the fishes found in the river  
42 Ganges and its tributaries. The documentation and listing of the fishes from different part of India was carried out  
43 mainly by Jerdon (1848). A comprehensive and authoritative account on the freshwater fishes has been provided  
44 by Day (1865 – 1878). The further investigations on the freshwater fishes of India especially the Western Ghats  
45 was initiated by Hora (1921; 1937; 1938; 1941; 1942; 1949) and he enunciated the Satpura Hypothesis. These led  
46 to the new descriptions, enlisting with elaborate discussions on the endemism and other zoogeographical relevance  
47 and several new taxa have been added from Kerala during this period.

48 Studies on the endemic fishes from various streams and rivers in the Western Ghats mountain ranges  
49 have been compiled. Fish diversity in selected streams in northern Karnataka (Arunachalam *et al.*, 1997); Central  
50 Western Ghats (Arunachalam 2000) have been reported. Arunachalam *et al.*, (2005) reported a new fish species  
51 *Neolissocheilus wynaadensis* from the Karnataka part of Western Ghats. Arunachalam (2007) have reported  
52 *Psilorhynchus amplicephalus*, a new species from Balishwar river of Assam, India. Earlier Biju *et al.*, (1996) has  
53 recorded *Puntius filamentous* (Val.) and *Puntius melanampyx* (Day) in Orukomban and Thelikal during the survey  
54 from December 1996 to May 1997. Manimekalan (2002) has rediscovered the critically endangered air birthing  
55 cat fish *Clarias dayi* hora (Pisces: *Claridae*) from Mudumalai Wildlife Sanctuary. Manimekalan (1998) has  
56 described a new species *Glyptothorax davissinghi* Manimekalan and *das* (Pisces: *Sisoridae*), a new cat fish from  
57 Nilambur in the Nilgiri Biosphere, South India. Manimekalan (1997) made a new recorded of *Schismatorhynchus*  
58 (*Nukta nukta* (Sykes) (Pisces: Cyprinidae) from Moyar river. Arunkumkar *et al.*, (2015) has recorded 37 species  
59 from Cauvery river system. Silas (1951) listed 25 fish species from Anamalai hills and 10 species from  
60 Neliampathi hills. His study extended the distribution of several species earlier known only from the central  
61 division of the Western Ghats to the southern division beyond the Palghat gap.

## 62 2. METHODOLOGY

### 63 2.1 Collection and Identification

64 Fishes were collected using cast net, dip net, gill net and drag net from various streams and rivers of  
65 Southern Western Ghats. At most care was taken not to damage the species while collecting. A total of 5 specimens  
66 from each species were collected and fishes were photographed before it was preserved in formalin so that the  
67 fishes can be photographed with original colour. Further the specimens were preserved in 10 per cent formalin for  
68 smaller samples and for larger samples formalin has been injected into the abdominal cavity so that the internal  
69 organs are well preserved for further taxonomic studies. The specimens were tagged and the reference numbers  
70 were given for specimen identification and transported to Lab. The species were identified based on the key given  
71 by Talwar and Jhingran (1991), Jayaram (1999 & 2010) and Menon (1992). Holotype and paratypes of species  
72 were examined in Zoological Survey of India, Southern Regional station, Chennai and Kolkata for confirmation  
73 of species. Voucher specimens have been made for each species and deposited at the Biodiversity and DNA  
74 Barcoding Lab, Dept. of Environmental Sciences, Bharathiar University.

75

76

77

## 78 2.2 Physico-chemical Analysis of the Water Quality at Sampling Sites

79

80 Water samples were collected from all the seven sampling stations during post-monsoon, the depth of  
81 10cm. Water quality analyses such as pH, conductivity, turbidity, total dissolved solids (TDS), resistivity, salinity,  
82 dissolved oxygen (DO), and water temperature were done as per the regulations of APHA 1995, respectively.  
83 Field analysis of the samples was done using portable water analyzer (X tech, Nagman Instruments Electronics,  
84 India) (Gurumurthy and Tripti, 2015; Thomas *et al.*, 2015; Anushiya and Ramachandran, 2015).

85

## 86 2.3 Interpretative analysis

87

88 To quantify species diversity, for the purposes of comparison, a number of indices have been followed.  
89 To measure the species diversity (H) the most widely used Shannon index (Shannon and Weaver, 1949), Evenness  
90 index (E) (Pielou, 1975), and Dominance index (D) (Simpson, 1949) were used. Similarity coefficients of the fish  
91 community were calculated by using the widely used Jaccard index (Southwood, 1978). The above statistical  
92 analyses were performed using SPSS (version 21), XLSTAT, Biodiversity Pro software's.

93

## 94 2.4 Data processing and analysis

95

96 Further, the data from different appropriate sources are coded and recorded into a database system. For  
97 the accuracy of the data recorded at every source of the survey, correspondence between elementary data sheets  
98 and the original coding sheets were considered; accuracy and quality of the data were inspected up, edited, and  
99 coded at the field level.

100

## 101 3. RESULTS AND DISCUSSION

102 Fish Fauna were surveyed from the streams and rivers of Southern Western Ghats. Collection sites were  
103 selected based on the earlier faunal distribution published in literature. The Western Ghats is a mountain range  
104 that runs almost parallel to the western coast of Indian peninsula. It is a UNESCO World Heritage Site and is one  
105 of the eight "hottest hotspots" of biological diversity in the world. It is also called as "The Great Escarpment of  
106 India". The range of Western Ghats runs from north to south along the western edge of the Deccan Plateau, and  
107 separates the plateau from a narrow coastal plain, called Konkan, along the Arabian Sea. A total of thirty nine  
108 world heritage sites including national parks, wildlife sanctuaries and reserve forests - twenty in Kerala, ten in  
109 Karnataka, five in Tamil Nadu and four in Maharashtra adds fame to the Western Ghats. Fish fauna were collected  
110 from the long and meandering eastward flowing river systems of Southern Western Ghats, especially from  
111 Bhavani River System, Moyar River System, Chalakudy River System, Periyar River System, Cauvery River  
112 System and Nugu River System. The study sites and its characteristics are recorded and presented in Table 1 and  
113 Fig 1. In the present study a total of 31 sites of six river systems of Southern Western Ghats were studied in which  
114 a total of 64 species belonging to 6 orders, 14 families and 31 genera were recorded (Table. 2). Among the 64  
115 species *Cyprinidae* was the dominant family with 3 families 18 genus and 49 species (76.6%) compared to other  
116 order and families (Fig.2, Fig.7).

117

### 118 3.1 Fish Species Density, Abundance, and Distribution

119 Among the 31 sites high species diversity was recorded at Sinnaru of Cauvery River system ( $H' - 1.268$ )  
120 and low diversity was recorded at Thunakadavu tunnel, Chalakudy River System recorded ( $H' - 0.357$ ) (Table: 3,  
121 Fig: 3). The maximum species richness was recorded in Sinnaru ( $S - 21$ ) and the minimum species richness was  
122 recorded at Puliarkutti 3<sup>rd</sup> bridge, Thunakadavu tunnel and Sorrakottaodai ( $S - 3$ ), (Table: 3, Fig: 4). The  
123 maximum species abundance 152 was recorded at Naduthottam and lowest abundance 16 was recorded at  
124 Sorrakottaodai and Belikoonda (Table: 3, Fig: 5). The maximum dominance ( $D - 21.346$ ) was recorded at Sinnaru  
125 and lowest dominance ( $D - 2.121$ ) was recorded at Thunakadavu tunnel (Table: 3).

### 126 3.2 Species composition

127 Species similarity between the sites was very less among 31 sites of six river systems. Cluster analysis showed  
128 that similar species composition between the sites based on the species diversity. (Table:4, Fig: 6). Totally 5  
129 clusters were grouped for 31 sites of six river systems of southern Western Ghats from which it's clearly seen that  
130 most of the sampling sites were clustered together because of the similarity of species composition among the  
131 sites. Several sites where human disturbances are prevalent also fall in the same cluster. Certain sites remain  
132 separate, because only species composition in that particular site is not present in the other location. There are two  
133 main reasons for this separate clustering – 1. due to the rare species forms and 2. due to low water temperature.

### 134 3.3 Water Quality:

135 Water Quality parameters were recorded and presented in table 2.6. It is found that the parameters value  
136 lies between the IS: 10500 Permissible limits. (Table: 6). The acidic or alkaline nature of the water will be decided  
137 based on the pH level. Water pH ranges between 6.5 to 8.5, Kadapilliarthittu (pH - 9) was recorded with pH level  
138 is high and Anjurily, Athirapalli, Urilikal (pH – 7.2) recorded low pH level compared to the other sites. Low  
139 conductivity value 27.8mS was recorded in Puliarkutti river 8<sup>th</sup> bridge and Puliarkutti river 3<sup>rd</sup> bridge sites and  
140 high conductivity value 85.2mS recorded in Noolpuzha of Nugu river system. Total dissolved solids (TDS) are a  
141 measure of inorganic salts dissolved in water. This dissolved solid comes from both natural and human sources.  
142 Mitchell and Stapp in 1992 have suggested Changes in TDS concentrations that can be harmful. If TDS  
143 concentrations are too high or too low, the growth of much aquatic life can be limited, and death may occur.  
144 Thenkasithodu witnessed a low value of TDS content as 13.7 mg/l and Urilikal recorded a high value of TDS as  
145 51.9mg/l. A minimum Resistivity value of 2.58 was measured at Kadapilliarthittu and a maximum 45.6 was  
146 measured at Thenkasithodu. A high level of DO was recorded at Thenkasithodu as 6.11mg/l and a low level of  
147 DO was recorded at Belikoonda as 0.63 mg/l. Arunkumar *et al.*, (2015) recommended that the lowest DO recorded  
148 at sampling sites is due to organic-rich domestic waste let into the river by the tourists in the river system. Low  
149 value of salinity was recorded at sites viz., Thenkasithodu, Anjurily, Sorrakottaodai, Naduthotam, Nellithurai,  
150 Kovaikutralam falls, Puliarkutti River 8<sup>th</sup> bridge and Puliarkutti River 3<sup>rd</sup> bridge as 0.01 ppt and a high level of  
151 salinity was noted at Kadapilliarthittu as 0.18ppt. Maximum water temperature was recorded at Pillapara as  
152 33.6°C and a minimum water temperature was noted at Thenkasithodu as 18.9°C.

153

154 Rajan (1955) has studied the fishes of Moyar river system and has reported 48 species. Manimekalan  
155 (1998) has reported 38 species from Mudumalai wildlife sanctuary. Manimekalan has stated that species like  
156 *Labeo dero*, *Puntius mudumaliensis*, *Schimatorhynchus nukta*, *Danio neilgherriensis*, *Crossocheilus latius latius*,  
157 *Clarias dayi*, *Gambusia affinis* were restricted to Moyar river system. Also *Clarias dayi* a critically endangered  
158 species has been recorded by Manimekalan (2002). *Puntius carnaticus* and *Danio aequipinnatus* was recorded as  
159 common species of Moyar river system. Rajan (1955) and Mukerjii (1931) has studied the headwaters of Bhavani  
160 river and reported species like *Travancoria elangata*, *Barilius canarensis*, *Rasbora caveri*, *Garra menoni*, *Silurus*  
161 *wynaadensis* were restricted to Bhavani River system. *Puntius filamentosus*, *Puntius melanampyx*, *Puntius*  
162 *carnaticus*, *Barilius gatensis*, *Danio aequipinnatus*, *Rasbora daniconius* were very common in Bhavani River  
163 System. Arunkumkar *et al.*, (2015) has recorded 37 species from Cauvery river system. Among several fish  
164 species recorded, the only *Garra gotyla stenorhynchus* is reordered as one of the endangered species in Grand  
165 Anicut Cauvery, which is locally consumed (Murthy *et al.*, 2015). But *Garra gotyla stenorhynchus* is still under  
166 least concern status of IUCN.

167  
168 Silas (1951) in his faunal account discusses the extension of range of *Salmostoma acinaces* (*Chela*  
169 *argentea* Day), *Barbodes carnaticus* (*Barbus* (*Puntius*) *carnaticus*), *Osteochilus* (*Osteochilichthys*) *thomassi* and  
170 *Batasio travancoria* and lists 2 endemic species described by Herre viz. *Homoloptera Montana* and *Glyptothorax*  
171 *housei*. Silas further reported 5 species from the Cochin part of the anamalai hills viz. *Barilius bakeri*, *Puntius*  
172 *denisoni*, *Travancoria jonesi*, *Noemacheilus triangularis* and *Batasio travancoria*. *Punitus bimaculatus* earlier  
173 considered as a juvenile of *Puntius dorsalis* has been collected from these hills. Interestingly this species is found  
174 to be the most dominant *Puntius* species in the hill ranges of the Eastern Ghats especially Javadi hills. *Puntius*  
175 *punctatus* earlier considered as a synonym of *Punitus ticto* has been kept as a separate species and both these  
176 species have been collected from Anamalai hills (Menon, 1999).

177  
178 Diversity in the Anamalais is very high except for a few areas such as the Aliyar river basin. The lack  
179 of diversity in the Aliyar river basin is due to the fact that most of the streams in the area are non-perennial and  
180 are prone to disturbance/contamination by the local tribal people. This diversity is attributed to the controlled  
181 fishing activity by locals and protection by Forest officials. The physical environment like forest vegetation,  
182 riparian vegetation, water temperature, habitat type, and in-stream cover (which provide hiding places for fish)  
183 play a major role in species diversity and richness.

184 Altitude also plays a major role in species diversity. Colinvaux (1930) proposed the theory of diversity  
185 that changes with altitude on mountainsides – diversity is lowest at high elevation and vice versa. The present  
186 finding supports the above theory. The westward flowing Periyar River originates near moolavaigae and reaches  
187 the Periyar Lake. The Periyar Tiger Reserve is one of the biodiversity rich areas in southern Western Ghats from  
188 where the Periyar River originates, (Silas 1950, 1952; Kurup *et al.*, 2004). Earliest studies on the fish fauna of the  
189 PTR dates back to 1948 when Chacko (1948) listed 35 species from the Periyar Lake, including the critically  
190 endangered small scaled *Schizothoracin Lepidopygopsis typus*. Later Menon & Remadevi (1995) described  
191 *Hypselobarbus kurali* from streams adjoining the Periyar Lake raising the total number of fish species to 38. In  
192 the present study 64 species were collected from 31 study sites of six river systems of southern western ghats.  
193 Species like *Puntius melanampyx*, *Puntius carnaticus*, *Puntius amphibious*, *Puntius fasciatus*, *Puntius mahecola*,

194 *Devario aequipinnatus*, *Garra mullya*, *Travancoria jonesi*, *Nemacheilus guntheri* were commonly found in all  
195 the six river systems (Fig:7).

196

197 Smith has stated that habitat selection of the fishes is influenced by the body structure, food and shelter  
198 and by physiological process. Moreover the fish analyses the characters of the rivers and streams and further they  
199 respond to the characters and helps themselves for the survival of the fittest. Hence it is reliable that the Micro  
200 and Macro habitat plays a key role in the morphology and physiological characters and modifications of the  
201 species. The fish prefers the habitat based on the nature of the rivers or stream substratum type where the muddy  
202 bottom with debris is records for high species richness of the bottom feeders. Odum (1945) well stated that the  
203 flow of the water in the channel is an important factor prevailing the distribution of fishes, the species like *Barilius*,  
204 *Hypselobarbus*, *Puntius*, *Travancoria*, *Rasbora* and *Tor* prefers fast flow. The nature of the substratum and the  
205 flow rate seem to be more or less closely interrelated in governing the distribution of the fishes. This induces the  
206 dominance of the cyprinid species to be well flourished in all the river systems, of the Southern Western Ghats. It  
207 is clear that Ecological structure plays a key role in representing River Systems of Southern Western Ghats which  
208 is flourished with rich species diversity and abundance.

#### 209 4. SUMMARY

210 The morphological-based fish taxonomy is more inconclusive because the micro and macro habitat have  
211 influenced the morphological variations within the species. In a recent publication by Rohan Pethiyagoda the  
212 genus *Puntius* is splitted into four genera like *Systomus*, *Dawkinsia*, *Dravidia* and *Pethia* which makes the genus  
213 still under inconclusive status. In the present study, the fish species were collected by using different mesh size  
214 of gill nets, cast net and dip nets from the long and meandering eastward flowing river systems of Bhavani, Moyar,  
215 Chalakudy, Periyar, Cauvery and Kabini. Species from Southern Western Ghats have a confusing taxonomy and  
216 exhibit a clear morphological variation within and between the species. The species collected in different  
217 geographical locations did not express variations in body patterns or in colorations. The species like *Puntius*  
218 *fasciatus* and *Puntius melanampyx* seems to be the same species temptationally but it turns out to be separate in  
219 individuality in most of the collections sites in Southern Western Ghats. In the present study a total of 31 sites of  
220 six river systems of Southern Western Ghats were studied in which a total of 64 species belonging to 6 orders, 14  
221 families and 31 genera were recorded. Among the 64 species *Cyprinidae* was the dominant family with 3 families  
222 18 genus and 49 species (76.6%) compared to other order and families, further the data analyses suggested that  
223 species belonging to the order Cypriniformes were found to be the dominant species in the locations considered  
224 in the present survey. Interestingly, among the 31 sites Thunakadavu stream, Gulithuraipatti, Athirappalli,  
225 Naduthotam, Nadathittu, Mullaitodu, Thonanthikla, Noolpuzha and Sinnaru exhibited high variations in species  
226 abundance and as well species richness. Importantly, the present study clearly documented that altitudes play a  
227 major role in species diversities and as well in species abundance. The fish is a healthy and high protein rich food,  
228 are in peril in Southern Western Ghats and the comprehensive listing of various species distribution and  
229 continuous monitoring is the most critical need of protection in the present scenario. It is very apparent to mention  
230 that the use of explosives, poisons and fishing of juveniles could be the primary causes to the sharp decline of the  
231 fish population in the study areas. Establishment of sanctuaries, preservation of genetic materials, awareness  
232 programmes and enforcement of laws are some of the short and long term remedial measures for the efficient  
233 conservation of faunal population in Southern Western Ghats. Social workers, fishermen and local people must

234 also be educated about the importance of conservation of fish fauna in their area in general, so that the personnel  
235 in turn can also make awareness among the people in an ecological spirit.

236

237

## 238 5. ACKNOWLEDGEMENT

239

240 The authors gratefully acknowledge facilities provided by the Department of Environmental Sciences,  
241 Biodiversity and DNA Barcoding Laboratory, Bharathiar University.

242

## 243 REFERENCES

244 Anushiya, J. and Ramachandran A.: Assessment of water availability in Chennai basin under present and future  
245 climate scenarios. Environ Manag River Bas Ecosys. pp 397-415, 2015.

246 APHA.: Standard methods. 19<sup>th</sup> Edition. American Public Health Association Washington, D.C, 1995.

247 Arunachalam, M., Madhusoodanan, K., Nair, C., Vijverberg, J. and Kortmulder, K.: Food and habitat partitioning  
248 among fishes in stream pools of South Indian river. Inter J Ecol and Envi Sci. 23: 271 – 395, 1997.

249 Arunachalam, M., Muralidharan, M. and Sivakumar P.: *Psilorhynchus amplicephalus*, a new species from  
250 Balishwar river of Assam, India. Cur Sci. 92: 1352 – 1354, 2007.

251 Arunachalam, M., Sankaranaraysnan, A., Johnson, J.A., and Manimekalan, A.: Fishes of Nambiyar river,  
252 Kalakkad Mundanthurai Tiger Reserve, Tamil Nadu. J Bom Nat His Soc. 97(1): 153 – 155, 2000.

253 Arunachalam, M., Sivakumar, P. and Muralitharan, M.: Habitat evaluation of pristine headwater streams of  
254 Western Ghats mountain ranges, Peninsular India. New trends in Fishery Development in India. Punjab  
255 University, India, pp. 253 – 286, 2005.

256 Arunkumar A A, Manimekalan A, Manikandan V and Velmurugan P.: Fish species richness and habitat quality  
257 mapping with geographical information system across Cauvery River in Tamil Nadu, India. J Aridlan  
258 Agri, 1: 43-54, 2015.

259 Biju, C.R., Raju Thomas. K. and Ajithkumar C.R.: Fishes of Parambikulam wildlife sanctuary Palakkad District,  
260 Kerala, 1996.

261 Chacko, P.I.: A survey of the fisheries of the Tungabhadra river. Proc. Indian Acad Sci. 28:166-175, 1948

262 Colinvaux, P.A.: Ecology congress cataloging in publication data, 1930.

263 Dahanukar, N., Raut, R. and Bhat, A.: Distribution, endemism and threat status of freshwater fishes in the Western  
264 Ghats of India. J Biogeo, 31 (1): 123-136, 2004.

265 Day, F.: On the fishes of Cochin, on the Malabar Coast of India. Part II. Anacanthini. Proc Zool Soc Lon. 1: 286  
266 – 318, 1865.

- 267 Day, F.: Monograph of Indian Cyprinidae. Parts 1-3. J Proc Asi Soc Ben. 40(1871): 95 – 143, 1871.
- 268 Day, F.: The fishes of India; being a natural history of fishes known to inhabit the seas and fresh waters of India,  
269 Burma and Ceylon. 4<sup>th</sup> ed. New Delhi, pp. 778,1878.
- 270 Day, F.: On the fishes of Cochin, on the Malabar Coast of India. Proc Gen Meet Sci Busi Zool Soc Lon. 33(1): 286  
271 – 318, 1685.
- 272 Gurumurthy G.P. and Tripti M.: Geochemical perspectives on river water of the tropical basins, Southwestern  
273 India. Environ Manag River Bas Ecosys. Heidelberg: Springer International Publishing. p. 329-53, 2015.
- 274 Hamilton - Buchanan, F.: An Account of the Fishes of River Ganges and its Branches. George Ramsay and Co.,  
275 London. pp. vii and 405, 1822.
- 276 Hora, S.L.: Notes on fishes in the Indian Museum on a new species of *Nemacheilus* from the Nilgiri Hills. Rec  
277 Ind Mus. 22: 19 – 21, 1921.
- 278 Hora, S.L.: Notes on fishes in the Indian Museum, on three collections of fish from Mysore and Coorg, South  
279 India. Rec Ind Mus. 39: 5 – 28, 1937.
- 280 Hora, S.L.: Homalopterid fishes from Peninsular India. Rec Ind Mus. XLIII: 211 – 232, 1941.
- 281 Hora, S.L.: Satpura hypothesis of the distribution of Malayan fauna and flora and flora of peninsular India. Proc  
282 Nat Inst Sci Ind. 15: 309 – 314, 1949.
- 283 Hora, S.L. and Misra, K.S.: Fish of Deolali, Part: III. Journal of Bombay Natural History Society. 40: 20 – 38,  
284 1938.
- 285 Jayaram, K.C.: The Freshwater Fishes of the Indian Region. Nerendra Publishing House, New Delhi. pp. xxvii  
286 and 551, 1999.
- 287 Jayaram, K.C.: The Freshwater Fishes of Indian Region, 2<sup>nd</sup> edition. Narendra Publications, New Delhi. pp. 119,  
288 2010.
- 289 Jerdon, T.C.: On the freshwater fishes of southern India. Mad J Lit Sci. 15 (1848): 141 – 149, 1848.
- 290 Kurup, B.M., Radhakrishnan K.V. and Manojkumar T.G.: Biodiversity status of fishes inhabiting rivers of Kerala  
291 (S. India) with special reference to endemism, threats and conservation measures. Proceedings of the  
292 Second Large Rivers Symposium, Phnom Penh, Kingdom of Cambodia. pp. 163 – 182, 2004.
- 293 Manimekalan, A. and M. Arunachalam.: Rediscovery of critically endangered air birthing cat fish *Clarias dayi*  
294 *hora* (Pisces:Claridae) from Mudumalai Wildlife Sanctuary, Tamil Nadu. J Bom Nat His Soc. 99(1): 129-  
295 131, 2002.
- 296 Manimekalan, A.: Fishes of Mudumalai Wildlife Sanctuary, South India. J Bom Nat His Soc., 95(3): 431 – 443,  
297 1998.



- 298 Manimekalan, A. and Das, H.S.: *Glyptothorax davissinghi* (Pisces: Sisoridae) A new cat fishes from Nilambur in  
299 the Nilgiri Biosphere, South India. J Bom Nat His Soc. 95(1): 87 – 91, 1998.
- 300 Manimekalan, A. and Singh.D.F.: New record of *Schismatorhynchus (Nukta) nukta* (Sykes) (Pisces: Cyprinidae)  
301 from Moyar river, extends its range to Tamil Nadu. J Bom Nat His Soc. 94(1): 170 – 171, 1997.
- 302 Menon, A.G.K. and Rema devi, K.: *Hypselobarbus kualii* (pisces: Cyprinidae) a new large barb from the south  
303 western rives of peninsular India. J Bom Nat His Soc. 92: 489 – 393, 1995.
- 304 Menon, A.G.K.: Check list - Fresh water fishes of India. Rec Zool Sur Ind, Occasional Paper. 175: 1 – 366, 1999.
- 305 Menon, A.G.K., and Rema Devi, K.: *Puntius sharmai*, a new cyprinid fish from Madras. J Bom Nat His Soc. 89:  
306 353 – 354, 1992.
- 307 Mukerji, D.D.: On a small collection of fish from the Bhavani river (S.India). J Bom Nat His Soc. 35(1): 162 –  
308 171, 1931.
- 309 Murthy KR, Dhanakumar S, Sundararaj P, Mohanraj R and Kumaraswamy K.: GIS-based modified SINTACS  
310 model for assessing groundwater vulnerability to pollution in Vellore District (Part of Palar River Basin),  
311 Tamil Nadu, India. Environ Manag R Bas Ecosys, 429-53, 2015.
- 312 Odum. H.T.: Primary production in flowing water. Limno Ocea, 1: 102 – 117, 1945.
- 313 Pielou EC.: Ecological Diversity. New York: Wiley, 1975.
- 314 Rajan, S.: Notes on collection of fish from the headwaters of the Bhavani river, South India. J Bom Nat His Soc.  
315 53: 44 – 48, 1955.
- 316 Shannon, C.E. and Weaver. W.: The mathematical theory of communications. Urbaba, University of Ilinois Press,  
317 1949.
- 318 Silas, E.G.: On a collection of fish from Travancore. J Bom Nat His Soc. 48: 792 – 795, 1950.
- 319 Silas, E.G.: On a collection of fish from the Annamalai and Nelliampathi hill ranges, Western Ghats, with a note  
320 on its zoogeographical significance. J Bom Nat His Soc. XLIX: 470 – 481, 1951.
- 321 Silas, E.G.: Fishes from the high ranges of Travancore. J Bom Nat His Soc. 50: 323 – 330, 1952.
- 322 Simpson, G.G.: Measurement of diversity, Nature. 136. pp. 688, 1949.
- 323 Southwood T R.: Ecological Methods. London: Chapmam and Hall, 1978.
- 324 Talwar, P.K. and Jhingran, A.G.: Inland fishes of India and adjacent countries. Vol. I, Oxford & IBH Publishing  
325 Co. Pvt. Ltd, New Delhi, pp. 541, 1991.

326 Thomas J, Joseph S, Thirivikramji K. P.: Hydrogeochemical drivers and processes controlling solute chemistry of  
327 two Mountain River basins of contrasting climates in the Southern Western Ghats, India. Environ Manage  
328 River Bas Ecosys. pp 355-396, 2015.

**Table 1: Study site and its Habitat characteristics**

| S. No                         | Study site                          | Latitude           | Longitude          | Altitude | Forest type   | Stream order | Stream Width (m) | Stream Depth (m) | Area (m <sup>2</sup> ) | Volume (m <sup>3</sup> ) | Mean Velocity* (m/sec) |
|-------------------------------|-------------------------------------|--------------------|--------------------|----------|---------------|--------------|------------------|------------------|------------------------|--------------------------|------------------------|
| <b>Moyar River System</b>     |                                     |                    |                    |          |               |              |                  |                  |                        |                          |                        |
| 1                             | Gulithuraipatti                     | 11°33'20.4984"N    | 76° 59' 16.1016" E | 312      | Thorn forest  | 4            | 10               | 6                | 1000                   | 6000                     | 4                      |
| 2                             | Kallampalayam                       | 11° 31' 25.3992" N | 77° 0' 16.4016" E  | 300      | Thorn forest  | 4            | 13               | 8                | 1300                   | 10400                    | 4                      |
| 3                             | Belemeenthurai                      | 11° 36' 39.9996" N | 76° 47' 38.0004" E | 520      | Dry deciduous | 4            | 19               | 1.75             | 1900                   | 3325                     | 4                      |
| <b>Chalakudy River System</b> |                                     |                    |                    |          |               |              |                  |                  |                        |                          |                        |
| 4                             | Orukomban range                     | 10° 22' 53.6016" N | 76° 39' 21.3984" E | 450      | Dry deciduous | 4            | 6                | 0.5              | 600                    | 300                      | 3                      |
| 5                             | Thenmudiparai                       | 10° 24' 51.9984" N | 76° 36' 10.5012" E | 510      | Dry deciduous | 5            | 25               | 1.5              | 2500                   | 3750                     | 3                      |
| 6                             | Baghapallam                         | 10° 24' 57.6" N    | 76° 43' 21.3996" E | 748      | Dry deciduous | 5            | 8                | 0.5              | 800                    | 400                      | 3                      |
| 7                             | Thellikal                           | 10° 27' 34.2" N    | 76° 43' 48.7992" E | 840      | Dry deciduous | 4            | 4                | 1.0              | 400                    | 400                      | 3                      |
| 8                             | Puliyarkutti 8 <sup>th</sup> bridge | 10° 23' 39.6996" N | 76° 40' 8.1984" E  | 527      | Dry deciduous | 4            | 19.2             | 1.2              | 1920                   | 2304                     | 3                      |
| 9                             | Puliyarkutti 3 <sup>rd</sup> bridge | 10° 23' 52.5984" N | 76° 40' 51.3012" E | 512      | Dry deciduous | 4            | 37               | 1.5              | 3700                   | 5550                     | 3                      |
| 10                            | Thunakadavu stream                  | 10° 25' 44.1012" N | 76° 46' 4.6992" E  | 510      | Dry deciduous | 4            | 13.6             | 0.5              | 1360                   | 680                      | 3                      |
| 11                            | Thunakadavu tunnel                  | 10° 20' 9.3012" N  | 76° 34' 40.6992" E | 520      | Dry deciduous | 5            | 15               | 10               | 1500                   | 15000                    | 5                      |
| 12                            | Urilikal                            | 10° 19' 54.1992" N | 76° 53' 57.3" E    | 3238     | Dry deciduous | 2            | 7                | 1.5              | 700                    | 1050                     | 2                      |

|                             |                     |                    |                    |      |                |   |      |     |      |       |   |
|-----------------------------|---------------------|--------------------|--------------------|------|----------------|---|------|-----|------|-------|---|
| 13                          | Athirappalli        | 10° 18' 15.3598" N | 76° 34' 0.0012" E  | 202  | Semi evergreen | 4 | 8    | 3   | 800  | 2400  | 4 |
| 14                          | Pillapara           | 10° 17' 23.82" N   | 76° 32' 21.84" E   | 267  | Semi evergreen | 4 | 5    | 2   | 500  | 1000  | 4 |
| <b>Bhavani River System</b> |                     |                    |                    |      |                |   |      |     |      |       |   |
| 15                          | Kovaikutralam falls | 10° 56' 20.1516" N | 76° 41' 21.0084" E | 560  | Semi evergreen | 2 | 5    | 1.2 | 500  | 600   | 4 |
| 16                          | Nellithurai         | 11° 17' 0.3012" N  | 76° 53' 6.9" E     | 380  | Thorn forest   | 4 | 27   | 1.1 | 2700 | 2970  | 5 |
| <b>Periyar River System</b> |                     |                    |                    |      |                |   |      |     |      |       |   |
| 17                          | Oorpannikaham       | 9° 28' 58.1016" N  | 77° 16' 47.7012" E | 884  | Evergreen      | 4 | 12   | 2.1 | 1200 | 2520  | 2 |
| 18                          | Valukuparai         | 9° 28' 49.4004" N  | 77° 17' 35.0988" E | 869  | Evergreen      | 4 | 7.5  | 0.3 | 750  | 225   | 3 |
| 19                          | Melaparai           | 9° 26' 24.7992" N  | 77° 18' 24.5988" E | 965  | Evergreen      | 4 | 11   | 4.2 | 1100 | 4620  | 3 |
| 20                          | Naduthotam          | 9° 26' 5.1" N      | 77° 18' 48.0996" E | 950  | Evergreen      | 4 | 7.5  | 0.3 | 750  | 225   | 3 |
| 21                          | Ummikuppamthodu     | 9° 28' 20.6004" N  | 77° 14' 57.0984" E | 943  | Evergreen      | 4 | 5    | 3.0 | 500  | 1500  | 4 |
| 22                          | Sorrakottaodai      | 9° 28' 45.4008" N  | 77° 15' 32.7996" E | 879  | Evergreen      | 4 | 7    | 1.5 | 700  | 1050  | 3 |
| 23                          | Mullaithodu         | 9° 31' 58.6992" N  | 77° 16' 15.8016" E | 869  | Evergreen      | 4 | 10   | 0.6 | 1000 | 600   | 3 |
| 24                          | Anjurily            | 9° 33' 46.1988" N  | 77° 9' 19.6992" E  | 912  | Evergreen      | 4 | 20   | 5   | 2000 | 10000 | 2 |
| 25                          | Thenkasithodu       | 9° 30' 59.4" N     | 77° 7' 5.9988" E   | 872  | Evergreen      | 4 | 11.3 | 0.5 | 1130 | 565   | 2 |
| <b>Cauvery River System</b> |                     |                    |                    |      |                |   |      |     |      |       |   |
| 26                          | Kadapilliyarthittu  | 12° 7' 18.1992" N  | 77° 46' 28.3008" E | 1137 | Dry deciduous  | 4 | 75   | 1.5 | 7500 | 11250 | 2 |

|                          |              |                    |                    |      |                |   |    |     |      |       |   |
|--------------------------|--------------|--------------------|--------------------|------|----------------|---|----|-----|------|-------|---|
| 27                       | Belikoonda   | 12° 11' 2.1012" N  | 77° 43' 12.6012" E | 267  | Dry deciduous  | 4 | 80 | 10  | 8000 | 80000 | 5 |
| 28                       | Nadathittu   | 12° 8' 31.9992" N  | 77° 44' 48.9984" E | 262  | Dry deciduous  | 4 | 70 | 6   | 7000 | 42000 | 3 |
| 29                       | Sinnaru      | 12° 6' 54.7992" N  | 77° 46' 48.5004" E | 225  | Dry deciduous  | 4 | 55 | 0.5 | 5500 | 2750  | 3 |
| 30                       | Thonanthikla | 12° 7' 2.3988" N   | 77° 46' 36.6996" E | 341  | Dry deciduous  | 4 | 25 | 1   | 2500 | 2500  | 4 |
| <b>Nugu River System</b> |              |                    |                    |      |                |   |    |     |      |       |   |
| 31                       | Noolpuzha    | 11° 41' 35.0988" N | 76° 23' 36.3984" E | 2810 | Semi evergreen | 3 | 25 | 4.1 | 2500 | 10250 | 4 |

\*Velocity (m/sec): 1. Very slow (<.05); 2. Slow (0.05-0.2); 3. Moderate (0.2-0.5); 4. Fast (0.5-1.0); 5. Very fast (>1).

Table 2: List of Freshwater Fauna recorded during the present study

| S.no | Species                             | Distribution locations | IUCN |
|------|-------------------------------------|------------------------|------|
|      | <b>Order: Cypriniformes</b>         |                        |      |
|      | <b>Family: Cyprinidae</b>           |                        |      |
|      | <b>Sub - Family: Cyprininae</b>     |                        |      |
| 1    | <i>Puntius melanampyx</i>           | 18                     | DD   |
| 2    | <i>Puntius carnaticus</i>           | 10                     | LC   |
| 3    | <i>Puntius amphibius</i>            | 4                      | DD   |
| 4    | <i>Haludaria fasciatus</i>          | 11                     | LC   |
| 5    | <i>Dawlinsia filamentosus</i>       | 4                      | LC   |
| 6    | <i>Puntius sarana sarana</i>        | 4                      | LC   |
| 7    | <i>Puntius dorsalis</i>             | 2                      | LC   |
| 8    | <i>Puntius chola</i>                | 2                      | LC   |
| 9    | <i>Puntius sophore</i>              | 1                      | LC   |
| 10   | <i>Eechathalakenda ophicephalus</i> | 2                      | EN   |
| 11   | <i>Puntius mahecola</i>             | 7                      | DD   |
| 12   | <i>Pethia conconius</i>             | 4                      | LC   |
| 13   | <i>Sahyadria denisonii</i>          | 2                      | EN   |
| 14   | <i>Sahyadria chalakudiensis</i>     | 2                      | EN   |
| 15   | <i>Puntius sarana spirulus</i>      | 1                      | LC   |
| 16   | <i>Puntius bimaculatus</i>          | 3                      | LC   |
| 17   | <i>Pethia ticto</i>                 | 1                      | LC   |
| 18   | <i>Cirrhinus cirrhosus</i>          | 2                      | VU   |
| 19   | <i>Skymatorynchus nukta</i>         | 3                      | EN   |
| 20   | <i>Labeo boggut</i>                 | 1                      | LC   |
| 21   | <i>Labeo kontius</i>                | 1                      | LC   |
| 22   | <i>Labeo ariza</i>                  | 3                      | LC   |
| 23   | <i>Labeo calbasu</i>                | 2                      | LC   |
| 24   | <i>Labeo boga</i>                   | 2                      | LC   |

|    |                                    |    |    |
|----|------------------------------------|----|----|
| 25 | <i>Hypsilobarbus curmuca</i>       | 4  | EN |
| 26 | <i>Hypsilobarbus periyarensis</i>  | 3  | EN |
| 27 | <i>Hypsilobarbus dubius</i>        | 6  | EN |
| 28 | <i>Tor malabaricus</i>             | 5  | EN |
| 29 | <i>Tor kudhree</i>                 | 9  | EN |
| 30 | <i>Osteochilus longidorsalis</i>   | 2  | EN |
|    | <b>Sub - Family: Danioninae</b>    |    |    |
| 31 | <i>Salmophasia acinaces</i>        | 1  | LC |
| 32 | <i>Barilius gatensis</i>           | 16 | LC |
| 33 | <i>Barilius bakeri</i>             | 10 | LC |
| 34 | <i>Barilius barana</i>             | 2  | LC |
| 35 | <i>Barilius bendelisis</i>         | 3  | LC |
| 36 | <i>Devario aequipinnatus</i>       | 21 | LC |
| 37 | <i>Rasbora daniconius</i>          | 13 | LC |
|    | <b>Sub - Family: Oreininae</b>     |    |    |
| 38 | <i>Lepiphygopsis typus</i>         | 2  | EN |
|    | <b>Sub - Family: Garrinae</b>      |    |    |
| 39 | <i>Garra mullya</i>                | 16 | LC |
| 40 | <i>Garra surendranathi</i>         | 3  | EN |
| 41 | <i>Garra nastuta</i>               | 1  | LC |
| 42 | <i>Garra periyarensis</i>          | 2  | VU |
| 43 | <i>Garra hughi</i>                 | 3  | EN |
| 44 | <i>Garra gotyola stenorynchus</i>  | 2  | LC |
| 45 | <i>Crossochelius latius latius</i> | 1  | LC |
|    | <b>Family: Balitoridae</b>         |    |    |
|    | <b>Sub - Family: Balitorinae</b>   |    |    |
| 46 | <i>Travancoria jonesi</i>          | 8  | EN |
|    | <b>Sub - Family: Nemacheilinae</b> |    |    |
| 47 | <i>Nemacheilus dennisoni</i>       | 2  | LC |
| 48 | <i>Nemacheilus guntheri</i>        | 7  | LC |

|    |                                      |   |    |
|----|--------------------------------------|---|----|
|    | <b>Family: Cobitidae</b>             |   |    |
|    | <b>Sub - Family: Cobitinae</b>       |   |    |
| 49 | <i>Lepidocephalus thermalis</i>      | 5 | LC |
|    | <b>Order: Siluriformes</b>           |   |    |
|    | <b>Family: Bagridae</b>              |   |    |
|    | <b>Sub - Family: Bagrinae</b>        |   |    |
| 50 | <i><u>Hemibagrus</u> punctatus</i>   | 3 | CR |
| 51 | <i>Mystus cavasius</i>               | 4 | LC |
|    | <b>Family: Siluridae</b>             |   |    |
| 52 | <i>Ompok bimaculatus</i>             | 1 | NT |
|    | <b>Family: Sisoridae</b>             |   |    |
|    | <b>Sub - Family: Glyptosterninae</b> |   |    |
| 53 | <i>Glyptothorax housei</i>           | 1 | EN |
|    | <b>Order: Cyprinodontiformes</b>     |   |    |
|    | <b>Family: Aplocheilidae</b>         |   |    |
|    | <b>Sub - Family: Aplocheilinae</b>   |   |    |
| 54 | <i>Aplocheilus lineatus</i>          | 3 | LC |
|    | <b>Order: Synbranchiformes</b>       |   |    |
|    | <b>Sub- order: Mastacembeloidei</b>  |   |    |
|    | <b>Family: Mastacembelidae</b>       |   |    |
|    | <b>Sub - Family: Mastacembelinae</b> |   |    |
| 55 | <i>Macroganthus pancalus</i>         | 1 | LC |
| 56 | <i>Mastacembelus armatus</i>         | 1 | LC |
|    | <b>Order: Perciformes</b>            |   |    |
|    | <b>Sub- order: Percoidei</b>         |   |    |
|    | <b>Family: Ambassidae</b>            |   |    |
| 57 | <i>Chanda nama</i>                   | 2 | LC |
|    | <b>Family: Pristolepididae</b>       |   |    |
| 58 | <i>Pristolepis marignata</i>         | 3 | LC |
|    | <b>Sub- order: Labroidei</b>         |   |    |



|    |                               |   |    |
|----|-------------------------------|---|----|
|    | <b>Family: Cichlidae</b>      |   |    |
| 59 | <i>Oreochromis mosambica</i>  | 1 | NT |
| 60 | <i>Etroplus suratensis</i>    | 3 | LC |
| 61 | <i>Etroplus maculatus</i>     | 2 | LC |
|    | <b>Sub- order: Gobioidae</b>  |   |    |
|    | <b>Family: Gobiidae</b>       |   |    |
|    | <b>Sub - Family: Gobiinae</b> |   |    |
| 62 | <i>Glossogobius guiris</i>    | 1 | LC |
|    | <b>Order: Mugiliformes</b>    |   |    |
|    | <b>Sub- order: Belonoidei</b> |   |    |
|    | <b>Family: Belontiidae</b>    |   |    |
| 63 | <i>Xenotodon cancilia</i>     | 3 | LC |
|    | <b>Family: Hemiramphidae</b>  |   |    |
| 64 | <i>Hyporhamphus limbatus</i>  | 2 | LC |

\* EX – Extinct; EW – Extinct in the Wild; CR – Critically Endangered; EN – Endangered; VU – Vulnerable; NT – Near Threatened; LRnt – Low Risk near threatened; LRlc – Low Risk least concern; LRcd – Low Risk conservation dependent; DD – Data Deficient.

**Table 3: Indices of diversity of fishes respective to altitudes of six river systems**

| <b>Sampling Locations</b> | <b>Diversity (H')</b> | <b>Evenness (E)</b> | <b>Abundance</b> | <b>Richness (S)</b> | <b>Dominance (D)</b> |
|---------------------------|-----------------------|---------------------|------------------|---------------------|----------------------|
| Gulithuraipatti           | 0.769                 | 0.769               | 62               | 10                  | 5.016                |
| Kallampalayam             | 0.62                  | 0.686               | 38               | 8                   | 3.316                |
| Belemeenthurai            | 0.841                 | 0.932               | 19               | 8                   | 8.55                 |
| Orukomban range           | 0.711                 | 0.842               | 49               | 7                   | 4.576                |
| Thenmudiparai             | 0.74                  | 0.875               | 59               | 7                   | 4.833                |
| Baghapallam               | 0.617                 | 0.793               | 36               | 6                   | 3.728                |
| Theellikal                | 0.805                 | 0.843               | 32               | 9                   | 5.701                |
| Puliyarkutti 8th bridge   | 0.879                 | 0.921               | 39               | 9                   | 7.8                  |
| Puliyarkutti 3rd bridge   | 0.401                 | 0.841               | 17               | 3                   | 2.429                |

|                     |       |       |     |    |        |
|---------------------|-------|-------|-----|----|--------|
| Thunakadavu stream  | 0.864 | 0.864 | 68  | 10 | 6.026  |
| Thunakadavu tunnel  | 0.357 | 0.748 | 42  | 3  | 2.121  |
| Urilikal            | 0.734 | 0.869 | 131 | 7  | 4.598  |
| Athirappalli        | 1.01  | 0.936 | 52  | 12 | 11.143 |
| Pillapara           | 0.718 | 0.923 | 25  | 6  | 5.769  |
| Kovaikutralam falls | 0.722 | 0.928 | 40  | 6  | 5      |
| Nellithurai         | 0.757 | 0.896 | 29  | 7  | 5.639  |
| Oorpannikaham       | 0.767 | 0.849 | 27  | 8  | 5.4    |
| Valukuparai         | 0.91  | 0.954 | 28  | 9  | 9.947  |
| Melapara            | 0.798 | 0.944 | 19  | 7  | 7.773  |
| Naduthotam          | 1.019 | 0.915 | 152 | 13 | 9.936  |
| Tmmikuppamthodu     | 0.527 | 0.678 | 41  | 6  | 2.384  |
| Sorrakottaodai      | 0.465 | 0.976 | 16  | 3  | 3.243  |
| Mullaithodu         | 1.045 | 0.968 | 48  | 12 | 12.966 |
| Anjurily            | 0.537 | 0.768 | 19  | 5  | 3.054  |
| Thenkasithodu       | 0.638 | 0.668 | 100 | 9  | 3.327  |
| Kadapilliyarthittu  | 0.8   | 0.886 | 37  | 8  | 6.055  |
| Belikoonda          | 0.625 | 0.804 | 16  | 6  | 3.75   |
| Nadathittu          | 1.198 | 0.921 | 77  | 20 | 15.481 |
| Sinnaru             | 1.268 | 0.959 | 75  | 21 | 21.346 |
| Thonanthikla        | 1.069 | 0.909 | 46  | 15 | 11.129 |
| Noolpuzha           | 0.946 | 0.946 | 78  | 10 | 8.938  |

**Table 4: Species composition among the 31 sites**

| <b>Cluster no</b> | <b>Cluster between</b> | <b>Study sites</b>                                                                                                                                                                                                                                                                                                                       |
|-------------------|------------------------|------------------------------------------------------------------------------------------------------------------------------------------------------------------------------------------------------------------------------------------------------------------------------------------------------------------------------------------|
| 1                 | 1 - 4                  | Thunakadavu stream, Baghapallam, Kallampalayam, Thunakadavu tunnel                                                                                                                                                                                                                                                                       |
| 2                 | 5 -7                   | Thenmudiparai, Orukomban range, Gulithuraipatti                                                                                                                                                                                                                                                                                          |
| 3                 | 8 - 28                 | Melaparai, Valukuparai, Belemeenthurai, Anjurily, Oorpannikaham, Nellithurai, Belikoonda, Kadapilliyarthittu, Sorrakottaodai, Puliarkutti 3 <sup>rd</sup> bridge, Mullaithodu, Kovaikutralam falls, Puliarkutti 8 <sup>th</sup> bridge, Sinnaru, Nadathittu, Thonanthikla, Thellikal, Pillapara, Athirapalli, Noolpuzha, Ummikuppamthodu |
| 4                 | 29                     | Naduthotam                                                                                                                                                                                                                                                                                                                               |
| 5                 | 30                     | Thenkasithodu                                                                                                                                                                                                                                                                                                                            |
| 6                 | 31                     | Urilikal                                                                                                                                                                                                                                                                                                                                 |

**Table 5: Distribution and abundance of fishes of six river systems**

| S.no | Collection sites (Collection site number as in Table 1) |    |   |   |   |    |   |    |    |    |    |    |    |    |    |    |    |    |    |    |    |    |    |    |    |    |    |    |    |    |    |  |
|------|---------------------------------------------------------|----|---|---|---|----|---|----|----|----|----|----|----|----|----|----|----|----|----|----|----|----|----|----|----|----|----|----|----|----|----|--|
|      | 1                                                       | 2  | 3 | 4 | 5 | 6  | 7 | 8  | 9  | 10 | 11 | 12 | 13 | 14 | 15 | 16 | 17 | 18 | 19 | 20 | 21 | 22 | 23 | 24 | 25 | 26 | 27 | 28 | 29 | 30 | 31 |  |
| 1    |                                                         |    |   | 4 | 6 | 12 | 7 | 10 | 5  | 11 |    | 32 | 5  | 2  | 5  |    |    | 2  | 2  |    |    | 5  | 4  | 5  | 2  |    |    |    |    |    | 10 |  |
| 2    | 1                                                       | 1  | 5 |   |   |    | 1 |    | 2  | 6  |    |    |    |    |    |    |    |    |    |    |    |    |    |    | 4  |    | 9  | 5  | 2  |    |    |  |
| 3    | 1                                                       | 2  |   |   |   |    | 1 |    |    |    |    |    |    |    |    |    |    |    |    |    |    |    |    |    |    |    |    |    | 2  |    |    |  |
| 4    |                                                         |    |   |   |   |    |   | 5  | 10 | 5  |    | 13 |    |    | 15 |    | 1  | 1  |    | 2  |    | 4  | 5  |    |    |    |    |    |    |    | 15 |  |
| 5    | 1                                                       |    |   |   |   |    |   |    |    |    |    |    |    |    |    |    |    |    |    |    |    |    |    |    |    |    |    | 5  | 2  | 5  |    |  |
| 6    | 15                                                      | 1  |   |   |   |    |   |    |    |    |    |    |    |    |    | 10 |    |    |    |    |    |    |    |    |    |    |    |    | 6  |    |    |  |
| 7    | 1                                                       | 1  |   |   |   |    |   |    |    |    |    |    |    |    |    |    |    |    |    |    |    |    |    |    |    |    |    |    |    |    |    |  |
| 8    | 7                                                       | 15 |   |   |   |    |   |    |    |    |    |    |    |    |    |    |    |    |    |    |    |    |    |    |    |    |    |    |    |    |    |  |
| 9    |                                                         |    |   |   |   |    |   |    |    |    |    | 11 |    |    |    |    |    |    |    |    |    |    |    |    |    |    |    |    |    |    |    |  |
| 10   |                                                         |    |   |   |   |    |   |    |    |    |    |    |    |    |    |    |    |    |    | 19 | 26 |    |    |    |    |    |    |    |    |    |    |  |
| 11   |                                                         |    |   |   |   |    |   |    |    |    | 25 |    | 8  | 5  |    | 5  |    |    |    |    |    |    |    |    | 4  | 3  | 3  |    |    |    |    |  |
| 12   |                                                         |    |   |   |   |    |   |    |    |    |    |    |    |    |    |    |    |    |    |    |    |    |    |    | 10 | 1  | 3  | 4  |    |    |    |  |
| 13   |                                                         |    |   |   |   |    |   |    |    |    |    |    | 5  | 5  |    |    |    |    |    |    |    |    |    |    |    |    |    |    |    |    |    |  |
| 14   |                                                         |    |   |   |   |    |   |    |    |    |    |    | 1  | 1  |    |    |    |    |    |    |    |    |    |    |    |    |    |    |    |    |    |  |
| 15   |                                                         |    |   |   |   |    |   |    |    |    |    |    |    |    |    | 3  |    |    |    |    |    |    |    |    |    |    |    |    |    |    |    |  |
| 16   |                                                         |    |   |   |   |    |   |    |    |    |    | 10 |    |    |    |    |    |    |    |    |    |    |    |    | 2  |    |    |    |    |    | 10 |  |
| 17   |                                                         | 1  |   |   |   |    |   |    |    |    |    |    |    |    |    |    |    |    |    |    |    |    |    |    |    |    |    |    |    |    |    |  |
| 18   |                                                         |    |   |   |   |    |   |    |    |    |    |    |    |    |    |    |    |    |    |    |    |    |    |    |    |    |    |    | 6  | 2  |    |  |
| 19   |                                                         |    |   |   |   |    |   |    |    |    |    |    |    |    |    | 2  |    |    |    |    |    |    |    |    |    |    |    |    | 3  |    | 5  |  |
| 20   |                                                         |    |   |   |   |    |   |    |    |    |    |    |    |    |    |    |    |    |    |    |    |    |    |    |    |    |    |    |    |    | 1  |  |
| 21   |                                                         |    |   |   |   |    |   |    |    |    |    |    |    |    |    |    |    |    |    |    |    |    |    |    |    |    |    |    |    |    | 2  |  |
| 22   |                                                         |    |   |   |   |    |   |    |    |    |    |    |    |    |    |    |    |    |    |    |    |    |    |    |    | 1  |    |    | 1  | 2  |    |  |
| 23   |                                                         |    |   |   |   |    |   |    |    |    |    |    |    |    |    |    |    |    |    |    |    |    |    |    |    |    | 1  | 1  |    |    |    |  |
| 24   |                                                         |    | 2 |   |   |    |   |    |    |    |    |    |    |    |    | 1  |    |    |    |    |    |    |    |    |    |    |    |    |    |    |    |  |
| 25   |                                                         |    |   |   |   |    |   |    |    |    |    |    |    |    |    |    | 1  |    |    |    |    |    | 7  | 1  |    |    |    |    |    |    | 2  |  |
| 26   |                                                         |    |   |   |   |    |   |    |    |    |    |    |    |    |    |    |    | 2  |    | 10 |    |    | 3  |    |    |    |    |    |    |    |    |  |
| 27   |                                                         |    | 1 |   |   |    |   |    |    |    |    |    |    |    |    |    |    |    | 1  | 15 |    |    |    |    |    | 1  | 3  | 3  |    |    |    |  |
| 28   |                                                         |    |   |   |   |    |   |    |    |    |    |    |    |    |    |    |    |    |    | 17 |    | 2  |    |    |    |    |    | 2  | 4  | 3  |    |  |
| 29   |                                                         |    |   |   | 2 |    | 2 |    |    |    |    |    |    |    |    |    | 5  | 3  | 2  | 10 |    |    |    |    |    |    |    | 2  | 3  | 4  |    |  |
| 30   |                                                         |    |   |   |   |    |   |    |    |    |    |    |    |    |    |    |    |    |    | 5  |    |    |    |    |    |    |    |    |    |    | 4  |  |
| 31   |                                                         |    |   |   |   |    |   |    |    |    |    |    |    |    |    |    |    |    |    |    |    |    |    |    |    |    |    | 4  |    |    |    |  |

|    |    |    |   |    |    |    |    |   |  |    |    |    |   |   |   |   |    |   |   |    |    |  |   |    |    |    |    |    |   |   |    |    |
|----|----|----|---|----|----|----|----|---|--|----|----|----|---|---|---|---|----|---|---|----|----|--|---|----|----|----|----|----|---|---|----|----|
| 32 | 4  |    | 4 | 18 | 11 |    | 3  | 5 |  | 5  |    |    | 5 |   | 4 | 3 |    | 2 |   | 20 | 4  |  | 5 |    | 20 |    |    |    |   |   |    | 10 |
| 33 |    |    |   | 2  | 8  |    |    | 2 |  |    |    |    | 2 |   | 5 | 5 | 2  |   |   |    | 15 |  |   |    |    | 21 |    |    |   |   |    | 8  |
| 34 |    |    |   |    |    |    |    | 2 |  | 5  |    |    |   |   |   |   |    |   |   |    |    |  |   |    |    |    |    |    |   |   |    |    |
| 35 |    |    |   |    |    |    |    |   |  |    |    |    |   |   |   |   |    |   |   |    |    |  |   |    |    | 2  |    |    | 3 | 3 |    |    |
| 36 | 11 | 15 | 2 | 5  | 7  | 14 | 4  | 6 |  | 23 | 15 | 47 | 5 | 5 | 6 |   |    | 2 |   | 10 | 2  |  |   |    | 47 |    |    | 10 | 2 | 3 |    |    |
| 37 |    |    |   | 7  | 3  |    | 1  |   |  |    |    | 14 | 4 |   |   |   |    | 4 |   | 2  | 5  |  |   | 10 | 1  |    |    | 2  | 7 | 5 |    |    |
| 38 |    |    |   |    |    |    |    |   |  |    |    |    |   |   |   |   | 10 |   |   |    | 25 |  |   |    |    |    |    |    |   |   |    |    |
| 39 | 20 | 2  |   | 12 | 22 | 4  | 11 | 3 |  | 7  |    |    | 8 | 7 |   |   |    |   |   |    |    |  |   | 2  | 2  |    | 2  |    | 3 | 4 | 11 |    |
| 40 |    |    |   |    |    |    |    |   |  |    |    |    | 6 |   |   |   |    |   |   |    |    |  |   | 6  |    | 3  |    |    |   |   |    |    |
| 41 |    |    |   |    |    |    |    |   |  |    |    |    |   |   |   |   | 3  |   |   |    |    |  |   |    |    |    |    |    |   |   |    |    |
| 42 |    |    |   |    |    |    |    |   |  |    |    |    |   |   |   |   |    | 4 |   |    |    |  |   | 2  |    |    |    |    |   |   |    |    |
| 43 |    |    |   |    |    |    |    |   |  |    |    |    |   |   |   |   |    | 5 | 5 |    | 2  |  |   |    |    |    |    |    |   |   |    |    |
| 44 |    |    |   |    |    |    |    |   |  |    |    |    |   |   |   |   |    |   |   |    |    |  |   |    |    |    |    | 2  | 4 |   |    |    |
| 45 |    |    |   |    |    |    |    |   |  |    |    |    |   |   |   |   | 1  |   |   |    |    |  |   |    |    |    |    |    |   |   |    |    |
| 46 |    |    |   |    |    | 1  |    | 5 |  |    |    |    |   |   | 5 |   | 4  | 5 | 4 |    | 2  |  |   |    | 2  |    |    |    |   |   |    |    |
| 47 |    |    | 1 |    |    |    |    |   |  |    |    |    |   |   |   |   |    |   | 3 |    |    |  |   |    |    |    |    |    |   |   |    |    |
| 48 |    |    |   |    |    | 4  | 2  | 1 |  | 1  |    |    |   |   |   |   |    |   |   |    |    |  |   |    | 4  |    | 2  |    |   |   |    | 4  |
| 49 |    |    |   | 1  |    |    |    |   |  |    |    |    | 2 |   |   |   |    |   |   |    | 2  |  |   |    | 3  |    |    |    | 7 |   |    |    |
| 50 |    |    | 2 |    |    |    |    |   |  |    |    |    |   |   |   |   |    |   |   |    |    |  |   |    |    |    |    |    | 1 | 3 |    |    |
| 51 |    |    | 2 |    |    |    |    |   |  |    |    |    |   |   |   |   |    |   |   |    |    |  |   |    |    |    |    |    |   | 1 | 2  | 10 |
| 52 |    |    |   |    |    |    |    |   |  |    |    |    | 1 |   |   |   |    |   |   |    |    |  |   |    |    |    |    |    |   |   |    |    |
| 53 |    |    |   |    |    | 1  |    |   |  |    |    |    |   |   |   |   |    |   |   |    |    |  |   |    |    |    |    |    |   |   |    |    |
| 54 |    |    |   |    |    |    |    |   |  |    |    | 4  |   |   |   |   |    |   |   |    |    |  |   |    |    | 7  | 5  |    |   |   |    |    |
| 55 |    |    |   |    |    |    |    |   |  |    |    |    |   |   |   |   |    |   |   |    |    |  |   |    |    |    |    |    |   | 2 |    |    |
| 56 |    |    |   |    |    |    |    |   |  |    |    |    |   |   |   |   |    |   |   |    |    |  |   |    |    |    |    |    |   |   | 1  |    |
| 57 |    |    |   |    |    |    |    |   |  |    |    | 3  |   |   |   |   |    |   |   |    |    |  |   |    |    |    |    |    |   | 7 |    |    |
| 58 |    |    |   |    |    |    |    |   |  |    | 2  | 2  |   |   |   |   |    |   |   |    |    |  |   |    |    | 1  |    |    |   |   |    |    |
| 59 | 1  |    |   |    |    |    |    |   |  |    |    |    |   |   |   |   |    |   |   |    |    |  |   |    |    |    |    |    |   |   |    |    |
| 60 |    |    |   |    |    |    |    |   |  |    |    |    |   |   |   |   |    |   |   |    |    |  |   |    |    |    | 10 | 8  | 1 |   |    |    |
| 61 |    |    |   |    |    |    |    |   |  |    |    |    |   |   |   |   |    |   |   |    |    |  |   |    |    | 4  |    | 10 |   |   |    |    |
| 62 |    |    |   |    |    |    |    |   |  |    |    |    |   |   |   |   |    |   |   |    |    |  |   |    |    |    |    |    |   | 5 |    |    |
| 63 |    |    |   |    |    |    |    |   |  |    |    |    |   |   |   |   |    |   |   |    |    |  |   |    |    |    |    |    | 2 | 2 | 2  |    |
| 64 |    |    |   |    |    |    |    |   |  |    |    |    |   |   |   |   |    |   |   |    |    |  |   |    |    |    |    |    | 2 |   | 1  |    |

**Table 6: Water quality of 31 study sites of six river systems**

| <b>Index</b>                        | <b>pH</b> | <b>Conductivity (mS)</b> | <b>TDS (ppm)</b> | <b>Resistivity (KΩ)</b> | <b>DO (mg/L)</b> | <b>Salinity (ppt)</b> | <b>Water temperature (°C)</b> |
|-------------------------------------|-----------|--------------------------|------------------|-------------------------|------------------|-----------------------|-------------------------------|
| Gulithuraipatti                     | 8.4       | 57.8                     | 20.37            | 24.2                    | 3.5              | 0.03                  | 23.8                          |
| Kallampalayam                       | 7.9       | 45.2                     | 28.5             | 21.9                    | 2.5              | 0.02                  | 24.1                          |
| Belemeenthurai                      | 8.4       | 59.2                     | 37.7             | 16.4                    | 1.3              | 0.03                  | 24.5                          |
| Orukomban range                     | 7.5       | 33.9                     | 26.5             | 22.4                    | 3.5              | 0.02                  | 23.4                          |
| Thenmudiparai                       | 8         | 45.2                     | 28.5             | 21.9                    | 2.5              | 0.02                  | 24.1                          |
| Baghapallam                         | 8         | 57.8                     | 38.0             | 16.8                    | 2.4              | 0.03                  | 21.7                          |
| Thellikal                           | 8.8       | 59.2                     | 37.7             | 16.4                    | 1.3              | 0.03                  | 24.5                          |
| Puliyarkutti 8 <sup>th</sup> bridge | 7.79      | 27.8                     | 18.0             | 34.8                    | 5.4              | 0.01                  | 23.5                          |
| Puliyarkutti 3 <sup>rd</sup> bridge | 7.79      | 27.8                     | 18.0             | 34.8                    | 5.4              | 0.01                  | 23.5                          |
| Thunakadavu stream                  | 5.9       | 38.3                     | 28.3             | 22.2                    | 5.09             | 0.02                  | 21.4                          |
| Thunakadavu tunnel                  | 5.9       | 38.3                     | 28.3             | 22.2                    | 5.09             | 0.02                  | 21.4                          |
| Urilikal                            | 7.2       | 78.7                     | 51.9             | 12.9                    | 1.4              | 0.03                  | 24.1                          |
| Athirappalli                        | 7.2       | 35.2                     | 47.5             | 3.97                    | 0.73             | 0.02                  | 32.7                          |
| Pillapara                           | 7.6       | 34.0                     | 19.5             | 29.9                    | 0.89             | 0.02                  | 33.6                          |
| Kovaikutralam falls                 | 7.5       | 31.3                     | 20.1             | 32.3                    | 3.2              | 0.01                  | 22.5                          |
| Nellithurai                         | 7.3       | 30.3                     | 20.3             | 31.5                    | 2.3              | 0.01                  | 25.5                          |
| Oorpannikaham                       | 8.3       | 50.3                     | 32.3             | 20.0                    | 1.2              | 0.02                  | 24.8                          |
| Valukuparai                         | 7.7       | 66.9                     | 43.8             | 15.1                    | 0.7              | 0.03                  | 24.8                          |
| Melaparai                           | 9         | 44.7                     | 28.8             | 22.5                    | 1.3              | 0.02                  | 26.1                          |
| Naduthotam                          | 7.5       | 46.2                     | 30.4             | 20.6                    | 0.7              | 0.01                  | 25.9                          |
| Ummikuppamthodu                     | 7.7       | 64.9                     | 43.2             | 17.1                    | 1.2              | 0.03                  | 24.8                          |
| Sorrakottaodai                      | 8         | 34.2                     | 21.9             | 29.5                    | 1.1              | 0.01                  | 23.1                          |
| Mullaitthodu                        | 8.1       | 78.6                     | 51.4             | 12.5                    | 0.9              | 0.04                  | 24.2                          |
| Anjurily                            | 7.2       | 21.5                     | 13.6             | 47.5                    | 4.86             | 0.01                  | 19.2                          |
| Thenkasithodu                       | 5.2       | 22.0                     | 13.7             | 45.6                    | 6.11             | 0.01                  | 18.9                          |
| Kadapillyarthittu                   | 9.6       | 39.1                     | 26.3             | 2.58                    | 0.72             | 0.18                  | 30.5                          |
| Belikoonda                          | 9.4       | 39.8                     | 26.3             | 2.63                    | 0.63             | 0.17                  | 32.7                          |
| Nadathittu                          | 9.4       | 39.8                     | 26.3             | 2.63                    | 0.63             | 0.17                  | 32.7                          |
| Sinnaru                             | 9.2       | 39.5                     | 26.3             | 2.65                    | 3.11             | 0.11                  | 30.2                          |
| Thonanthikla                        | 9.2       | 39.5                     | 26.3             | 2.65                    | 3.11             | 0.11                  | 30.2                          |
| Noolpuzha                           | 7.32      | 85.2                     | 51.7             | 11.8                    | 3.62             | 0.04                  | 23.2                          |

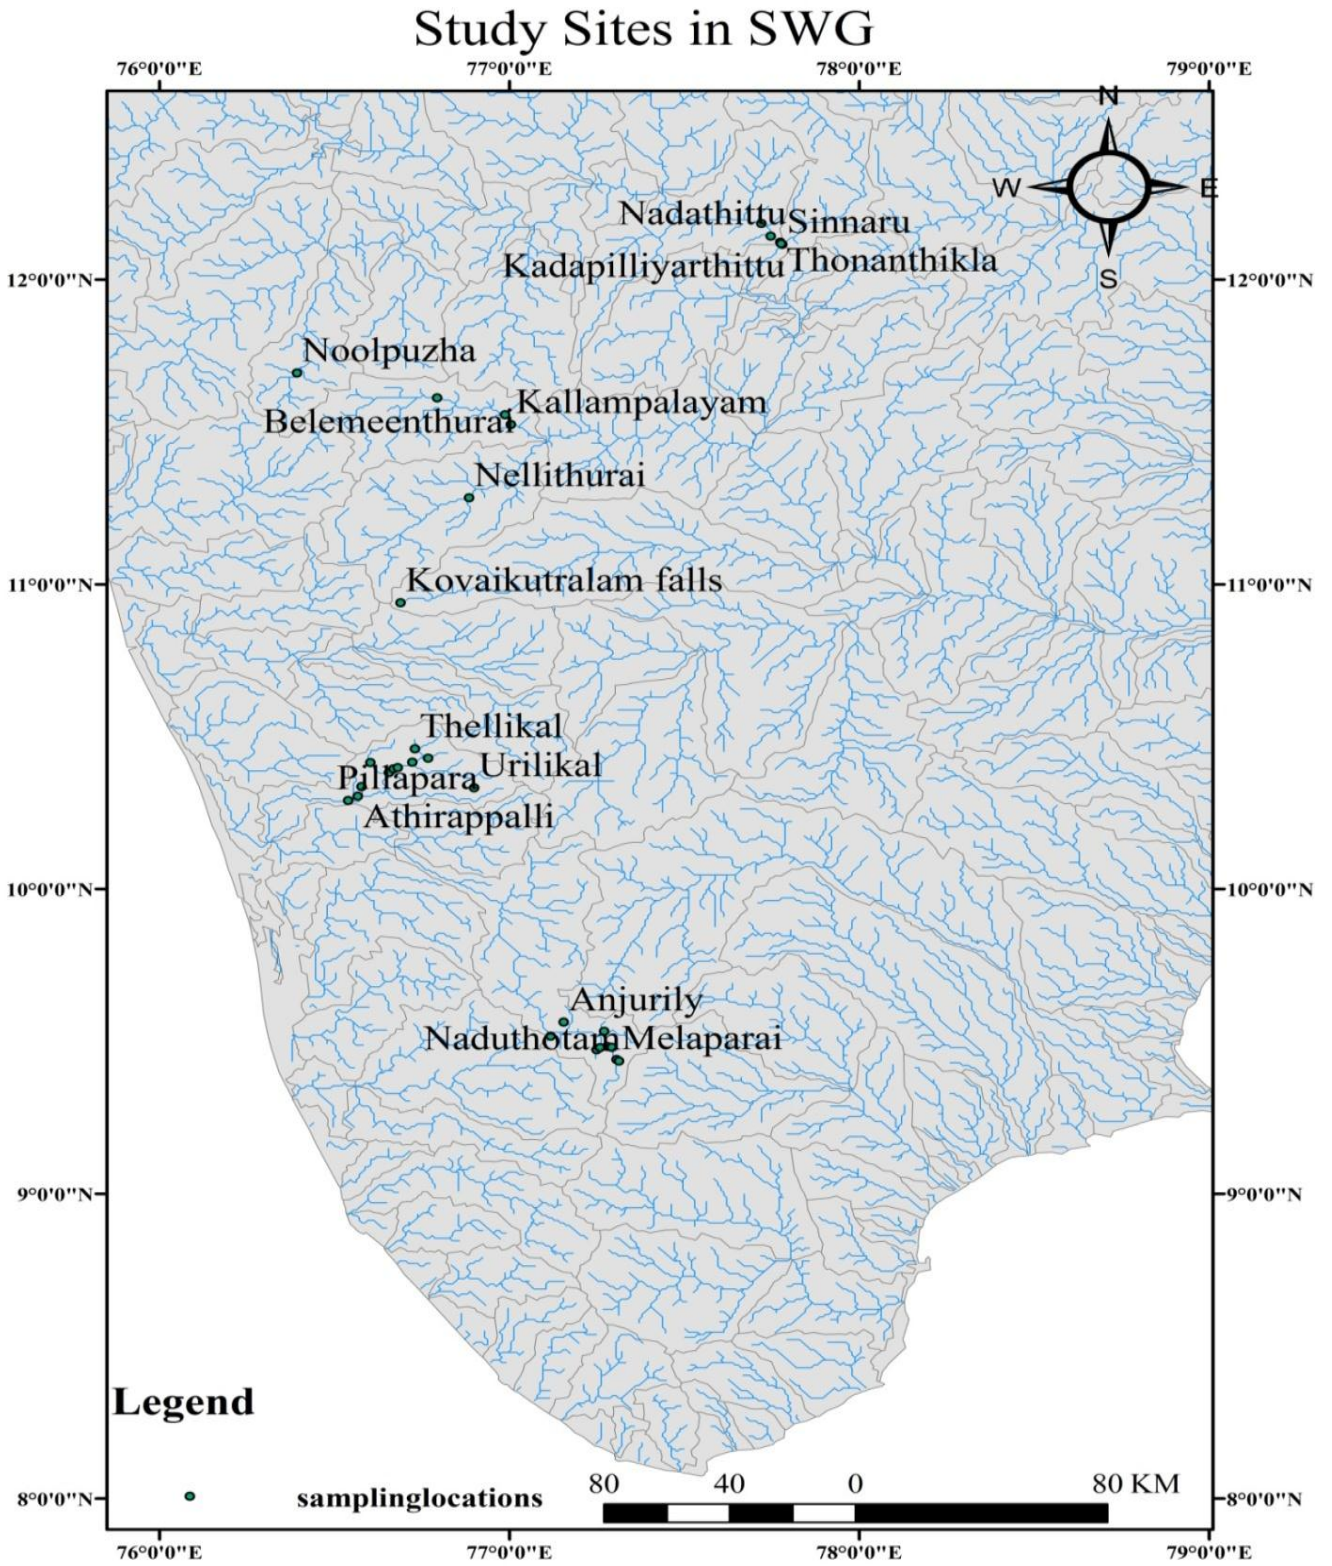

Fig 1: Collection location of six river systems

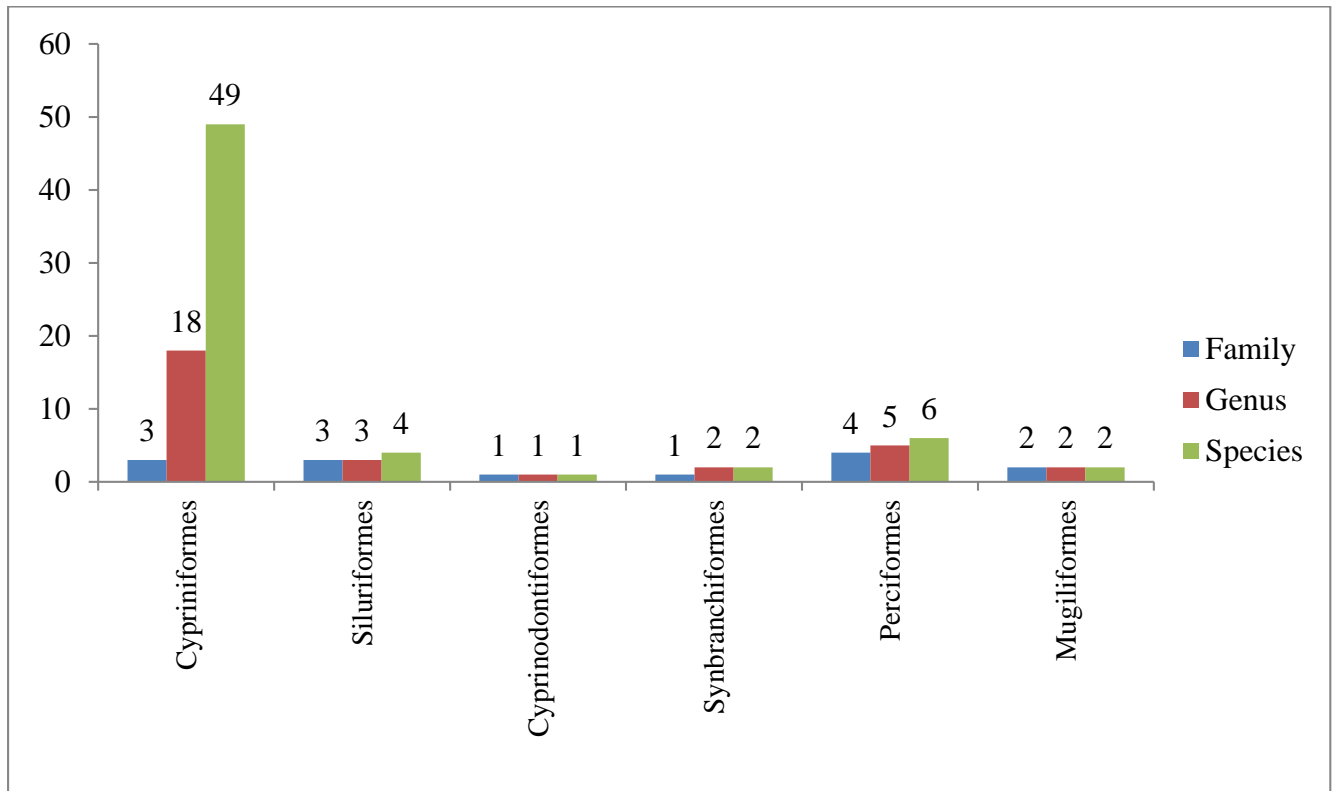

Fig. 2. Representation of fishes in different order

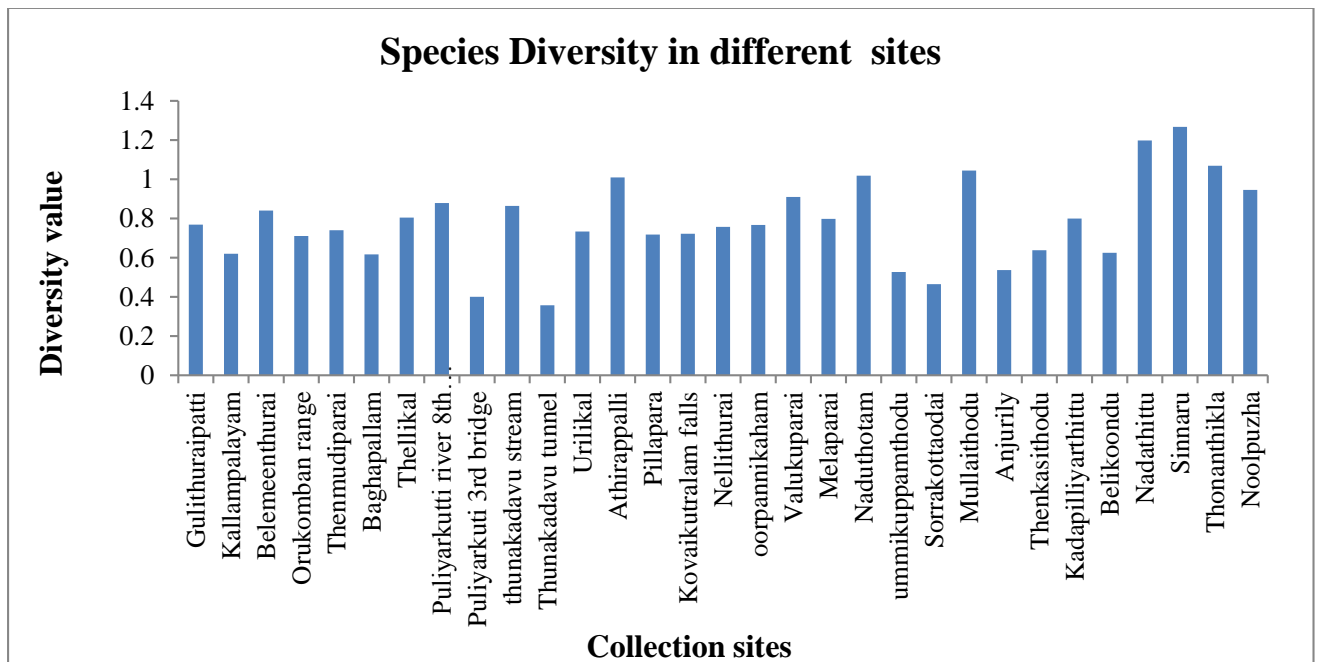

Fig 3: Species diversity in among 31 sites



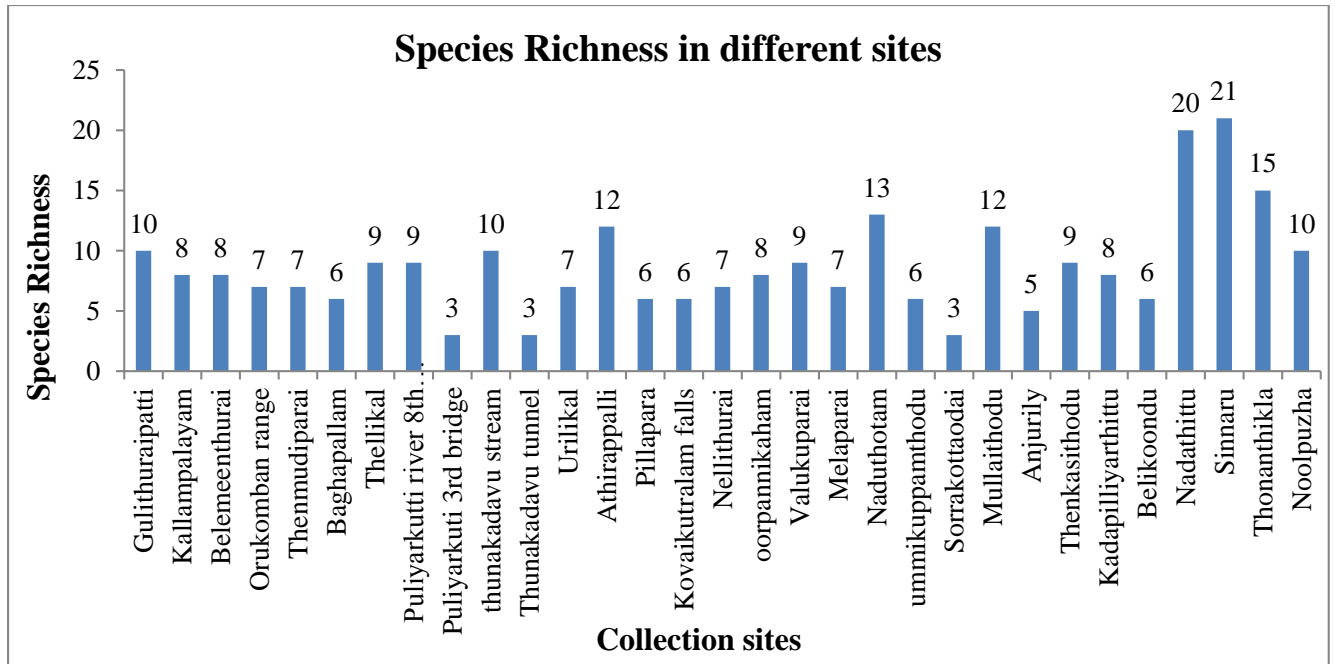

Fig 4: Species richness among 31 sites

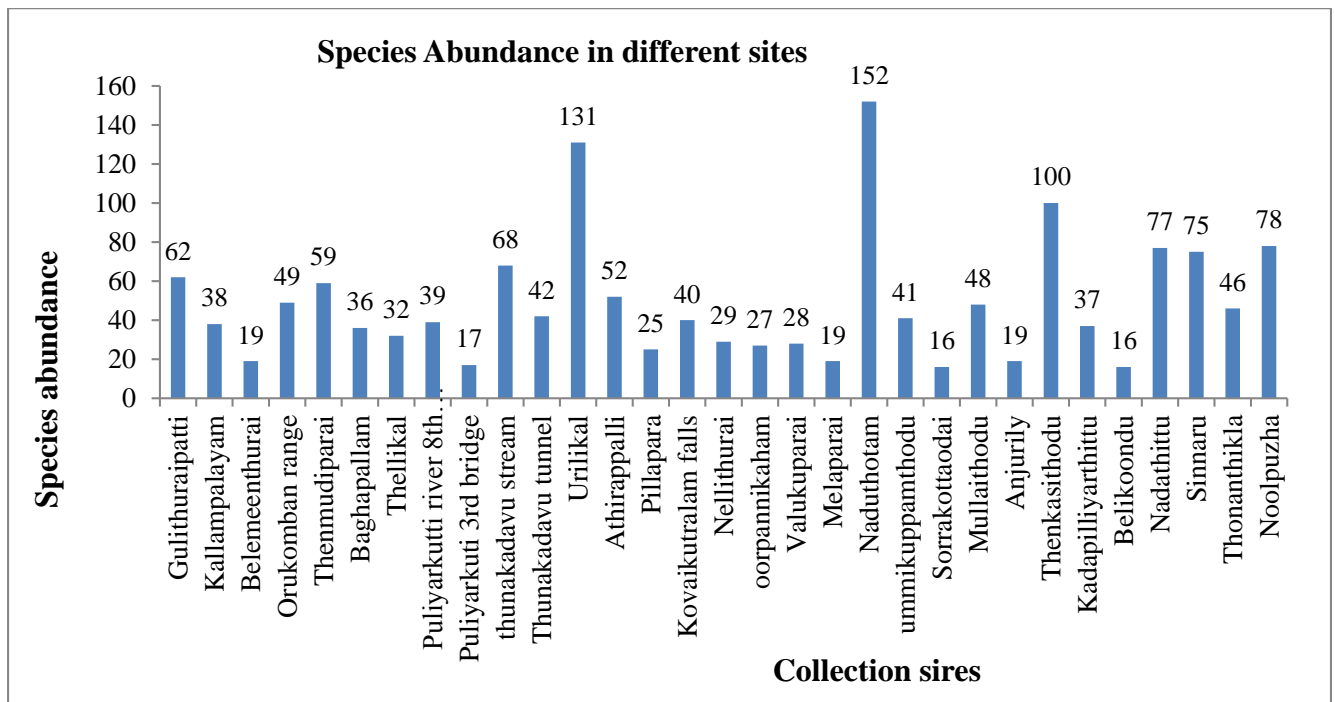

Fig 5: Species abundance in among 31 sites

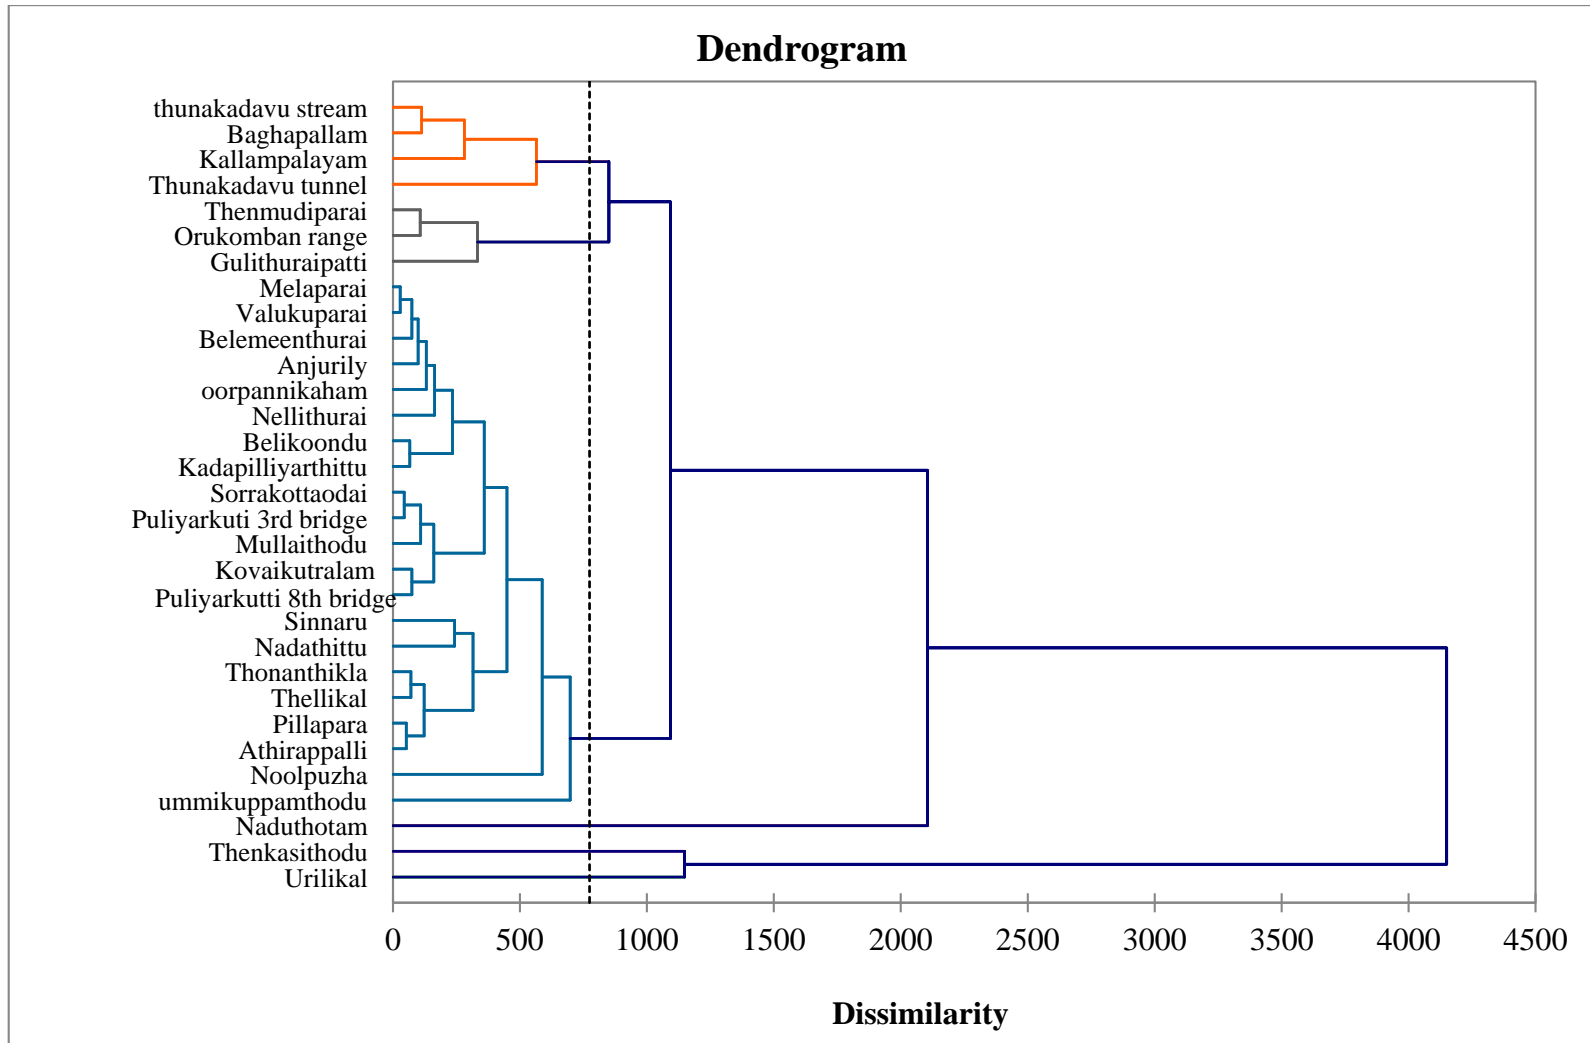

**Fig 6: Cluster dendrogram shows the dissimilarity between 31 sites**

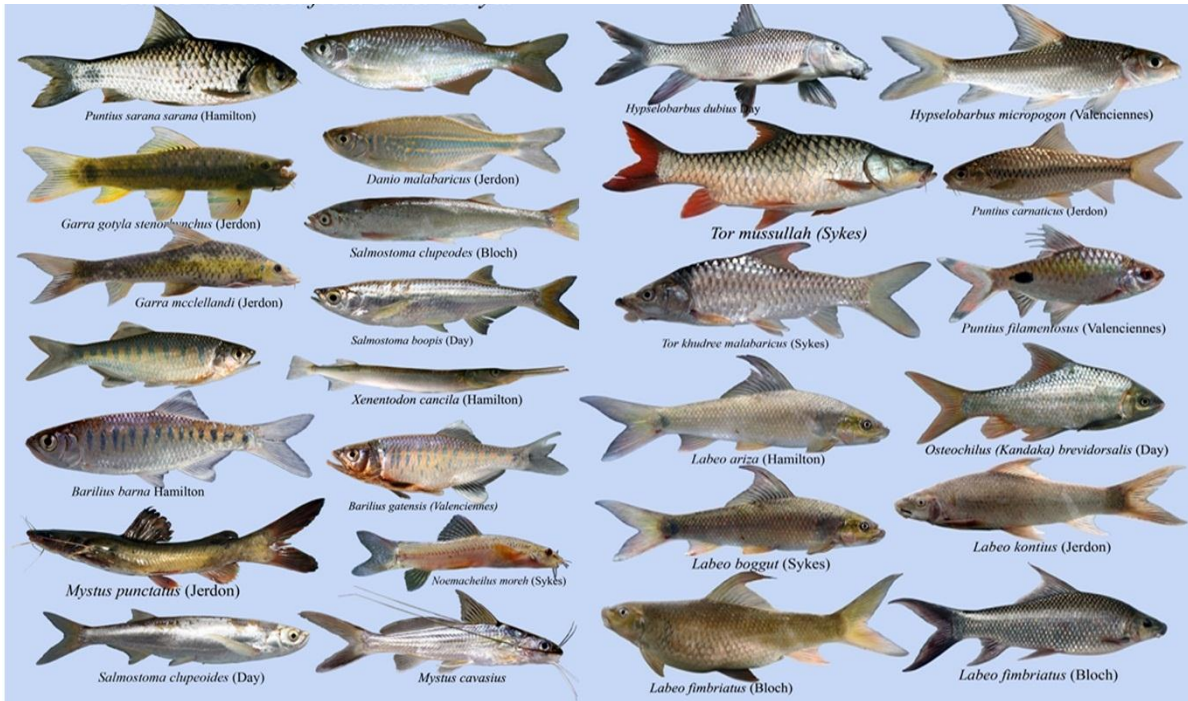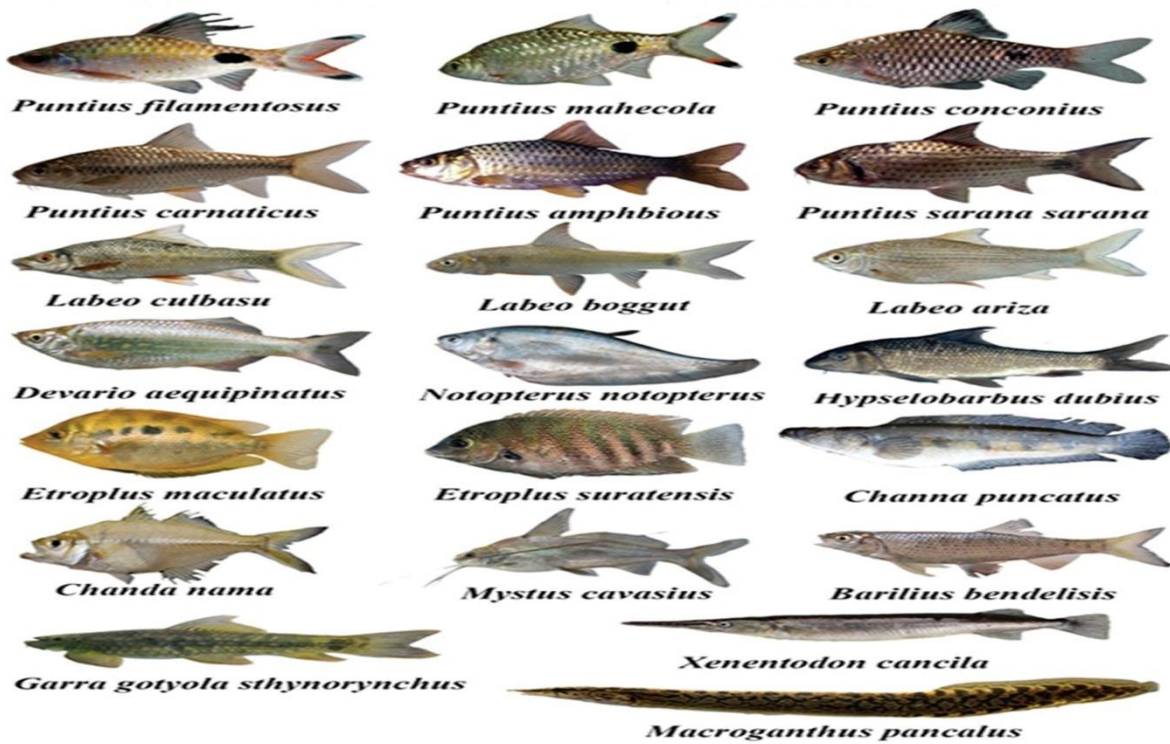

© Dr. A. Manimekalan & Dr. A. A. Arunkumar

Fig. 7: Fishes collected from various water bodies of SWG
