# Supplementary material for: Freshwater fish fauna of rivers in the southern Western Ghats, India
Source: Copernicus journal article supplement (doi:10.5194/essd-2017-118), 2017-11-01
Supplement: Supplementary file [file essd-2017-118-RC2-supplement.pdf]

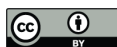

# 1 FRESHWATER FISH FAUNA OF RIVERS OF 2 SOUTHERN WESTERN GHATS, INDIA

3

4 Anbu Aravazhi Arunkumar<sup>1</sup>, Arunachalam Manimekalan<sup>2</sup>

5 <sup>1</sup>Department of Biotechnology, Karpagam Academy of Higher Education, Coimbatore 641 021.

6 Tamil Nadu, India

7 <sup>2</sup>Department of Environmental Sciences, Biodiversity and DNA Barcoding Lab, Bharathiar University,

8 Coimbatore 641 046, Tamil Nadu, India.

9 Correspondence to: Anbu Aravazhi Arunkumar ([anbu.arunkumar@gmail.com](mailto:anbu.arunkumar@gmail.com))

10 <https://doi.org/10.1594/PANGAEA.882214>

11

12

13 **Abstract.** We studied the freshwater fish fauna of Rivers of Southern Western Ghats for a period of three years  
14 from 2010 to 2013. We recorded 64 species belonging to 6 orders, 14 families and 31 genera. Alteration in the  
15 micro and macro habitats in the system severely affects the aquatic life especially fishes and also complicates  
16 the fish taxonomy. **In the present study a total of 31 sites of six river systems of Southern Western Ghats were**  
17 **studied in which a total of 64 species belonging to 6 orders, 14 families and 31 genera were recorded.** Among  
18 the 64 species *Cyprinidae* was the dominant family with **3 family** 18 genus and 49 species (76.6%) compared to  
19 other order and families, **further the data analyses suggested that species belonging to the order Cypriniformes**  
20 **were found to be the dominant species in the locations considered in the present survey.** Interestingly, among the  
21 31 sites Thunakadavu stream, Gulithuraipatti, Athirappalli, Naduthotam, Nadathittu, Mullaithodu,  
22 Thonanthikla, Noolpuzha and Sinnaru exhibited high variations in species abundance and as well species  
23 richness. Fifteen out of the 64 fish species endangered to the Western Ghats. *Garra periyarensis* and *Cirrhinus*  
24 *cirrhosus* are known to be vulnerable and *Hemibagrus punctatus* is Critically Endangered because of various  
25 anthropogenic activities. The significances of the study and timely measures needed to protect the species have  
26 also been concisely discussed.

27

28 **Keywords:** Southern Western Ghats, Water Quality, Species Diversity, Endemics, threats, Conservation.

29

## 30 1. **RODUCTION**

31 The Western Ghats of India has a rich freshwater fish fauna with a high level of endemism (Dahanukar  
32 *et al.*, 2004). However, current knowledge of the threats faced by Western Ghats fishes suggests that a major  
33 part of this fauna is threatened by human activities and invasive alien fish species (Dahanukar *et al.*, 2004).  
34 Thus, knowledge of the diversity and distribution of the fish fauna is essential for designing and implementing  
35 conservation strategies. However, data on the fish fauna of the Western Ghats have limitations as most of the  
36 rivers have not been surveyed extensively and checklists for individual rivers are not available. In the present  
37 study we document the freshwater fish fauna of the the long and meandering eastward flowing river systems of

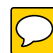

38 Southern Western Ghats, especially from Bhavani River System, Moyar River System, Chalakudy River  
39 System, Periyar River System, Cauvery River System and Nugu River System,  the southern region of the  
40 Western Ghats.

41 History of the Indian freshwater fishes is way back to Hamilton (1822) on the fishes found in the river  
42 Ganges and its tributaries. The documentation and listing of the fishes from different part of India was carried  
43 out mainly by Jerdon (1848). A comprehensive and authoritative account on the freshwater fishes has been  
44 provided by Day (1865 – 1878). The further investigations on the freshwater fishes of India especially the  
45 Western Ghats was initiated by Hora (1921; 1937; 1938; 1941; 1942; 1949) and he enunciated the Satpura  
46 Hypothesis. These led to the new descriptions, enlisting with elaborate discussions on the endemism and other  
47 zoogeographical relevance and several new taxa have been added from Kerala during this period.

48 Studies on the endemic fishes from various streams and rivers in the Western Ghats mountain ranges  
49 have been compiled. Fish diversity in selected streams in northern Karnataka (Arunachalam *et al.*, 1997);  
50 Central Western Ghats (Arunachalam 2000) have been reported. Arunachalam *et al.*, (2005) reported a new fish  
51 species *Neolissocheilus wynaadensis* from the Karnataka part of Western Ghats. Arunachalam (2007) have  
52 reported *Psilorhynchus amplicephalus*, a new species from Balishwar river of Assam, India. Earlier Biju *et al.*,  
53 (1996) has recorded *Puntius filamentous* (Val.) and *Puntius melanampyx* (Day) in Orukomban and Thelikal  
54 during the survey from December 1996 to May 1997. Manimekalan (2002) has rediscovered the critically  
55 endangered air birthing cat fish *Clarias dayi* hora (Pisces: *Clariidae*) from Mudumalai Wildlife Sanctuary.  
56 Manimekalan (1998) has described a new species *Glyptothorax davissinghi Manimekalan and das* (Pisces:  
57 *Sisoridae*), a new cat fish from Nilambur in the Nilgiri Biosphere, South India. Manimekalan (1997) made a  
58 new recorded of *Schismatorhynchus (Nukta) nukta* (Sykes) (Pisces: Cyprinidae) from Moyar river. Arunkumar  
59 *et al.*, (2015) has recorded 37 species from Cauvery river system. Silas (1951) listed 25 fish species from  
60 Anamalai hills and 10 species from Neliampathi hills. His study extended the distribution of several species  
61 earlier known only from the central division of the Western Ghats to the southern division beyond the Palghat  
62 gap.

## 63 2. METHODOLOGY

### 64 2.1 Collection and Identification

65 Fishes were collected using cast net, dip net, gill net and drag net from various streams and rivers of  
66 Southern Western Ghats. At most care was taken not to damage the species while collecting. A total of 5  
67 specimens from each species were collected and fishes were photographed before it was preserved in formalin  
68 so that the fishes can be photographed with original colour. Further the specimens were preserved in 10 per cent  
69 formalin for smaller samples and for larger samples formalin has been injected into the abdominal cavity so that  
70 the internal organs are well preserved for further taxonomic studies. The specimens were tagged and the  
71 reference numbers were given for specimen identification and transported to Lab. The species were identified  
72 based on the key given by  ar and Jhingran (1991), Jayaram (1999 & 2010) and Menon (1992). Holotype  
73 and paratypes of species were examined in Zoological Survey of India, Southern Regional station, Chennai and  
74 Kolkata for confirmation of species. Voucher specimens have been made for each species and deposited at the  
75 Biodiversity and DNA Barcoding Lab, Dept. of Environmental Sciences, Bharathiar University.

76

77

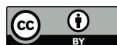

78

79 **2.2 Physico-chemical Analysis of the Water Quality at Sampling Sites**

80

81 Water samples were collected from all the **seven sampling stations** during post-monsoon, the depth of  
82 10cm. Water quality analyses such as pH, conductivity, turbidity, total dissolved solids (TDS), resistivity,  
83 salinity, dissolved oxygen (DO), and water temperature were done as per the regulations of **APHA 1995**,  
84 respectively. Field analysis of the samples was done using portable water analyzer (X tech, Nagman Instruments  
85 Electronics, India) (Gurumurthy and Tripti, 2015; Thomas *et al.*, 2015; Anushiya and Ramachandran, 2015).  
86

86

87 **2.3 pretative analysis**

88

89 To quantify species diversity, **the purposes of comparison**, a number of indices have been followed.  
90 To measure the species diversity ( $H'$ ) the most widely used Shannon index (Shannon and Weaver, 1949),  
91 Evenness index (E) (Pielou, 1975), and Dominance index (D) (Simpson, 1949) were used. Similarity  
92 coefficients of the fish community were calculated by using the widely used Jaccard index (Southwood, 1978).  
93 The above statistical analyses were performed using **software**.  
94

94

95 **2.4 processing and analysis**

96

97 Further, the data from different appropriate sources are coded and recorded into a database system. For  
98 the accuracy of the data recorded at every source of the survey, correspondence between elementary data sheets  
99 and the original coding sheets were considered; accuracy and quality of the data were inspected up, edited, and  
100 coded at the field level.  
101

101

102 **3. RESULTS AND DISCUSSION**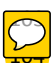

**Fish Fauna** were surveyed from the streams and rivers of Southern Western Ghats. Collection sites  
105 were selected based on the earlier faunal distribution published in literature. The Western Ghats is a mountain  
106 range that runs almost parallel to the western coast of Indian peninsula. It is a UNESCO World Heritage Site  
107 and is one of the eight "hottest hotspots" of biological diversity in the world. It is also called as "The Great  
108 Escarpment of India". The range of Western Ghats runs from north to south along the western edge of the  
109 Deccan Plateau, and separates the plateau from a narrow coastal plain, called Konkan, along the Arabian Sea. A  
110 total of thirty nine world heritage sites including national parks, wildlife sanctuaries and reserve forests - twenty  
111 in Kerala, ten in Karnataka, five in Tamil Nadu and four in Maharashtra adds fame to the Western Ghats. Fish  
112 fauna were collected from the long and meandering eastward flowing river systems of Southern Western Ghats,  
113 especially from Bhavani River System, Moyar River System, Chalakudy River System, Periyar River System,  
114 Cauvery River System and Nugu River System. The study sites and its characteristics are recorded and  
115 presented in Table 1 and Fig 1. In the present study a total of 31 sites of six river systems of Southern Western  
116 Ghats were studied in which a total of 64 species belonging to 6 orders, 14 families and 31 genera were recorded  
117 (Table. 2). Among the 64 species *Cyprinidae* was the dominant family with 3 family 18 genus and 49 species  
(76.6%) compared to other order and families (Fig.2, Fig.7).



118

119 **3.1  Species Density, Abundance, and Distribution**

120 Among the 31 sites high species diversity was recorded at Sinnaru of Cauvery River system ( $H'$ -  
121 1.268) and low diversity was recorded at Thunakadavu tunnel, Chalakudy River System recorded ( $H'$ - 0.357)  
122 (Table: 3, Fig: 3). The maximum species richness was recorded in Sinnaru ( $S - 21$ ) and the minimum species  
123 richness was recorded at Puliyarkutti 3<sup>rd</sup> bridge, Thunakadavu tunnel and Sorrakottaodai ( $S - 3$ ), (Table: 3, Fig:  
124 4). The maximum species abundance 152 was recorded at Naduthottam and lowest abundance 16 was recorded  
125 at Sorrakottaodai and Belikoonda (Table: 3, Fig: 5). The maximum dominance ( $D - 21.346$ ) was recorded at  
126 Sinnaru and lowest dominance ( $D - 2.121$ ) was recorded at Thunakadavu tunnel (Table: 3).

127 **3.2  Species composition**

128 Species similarity between the sites was very less among 31 sites of six river systems. Cluster analysis showed  
129 that similar species composition between the sites based on the species diversity. (Table:4, Fig: 6). Totally 5  
130 clusters were grouped for 31 sites of six river systems of southern Western Ghats from which it's clearly seen  
131 that most of the sampling sites were clustered together because of the similarity of species composition among  
132 the sites. Several sites where human disturbances are prevalent also fall in the same cluster. Certain sites remain  
133 separate, because **only species composition in that particular site is not present in the other location**. There are  
134 two main reasons for this separate clustering – 1. due to the rare species forms and 2. due to low water  
135 temperature.

136 **3.3  Water Quality:**

137 Water Quality parameters were recorded and presented in table 2.6. It is found that the parameters  
138 value lies between the IS: 10500 Permissible limits. (Table: 6). The acidic or alkaline nature of the water will be  
139 decided based on the pH level. Water pH ranges between 6.5 to 8.5, Kadapilliarthittu (pH - 9) was recorded  
140 with pH level is high and Anjurily, Athirapalli, Urilikal (pH – 7.2) recorded low pH level compared to the other  
141 sites. Low conductivity value 27.8mS was recorded in Puliyarkutti river 8<sup>th</sup> bridge and Puliyarkutti river 3<sup>rd</sup>  
142 bridge sites and high conductivity value 85.2mS recorded in Noolpuzha of Nugu river system. Total dissolved  
143 solids (TDS) are a measure of inorganic salts dissolved in water. This dissolved solid comes from both natural  
144 and human sources. Mitchell and Stapp in 1992 have suggested Changes in TDS concentrations that can be  
145 harmful. If TDS concentrations are too high or too low, the growth of much aquatic life can be limited, and  
146 death may occur. Thenkasithodu witnessed a low value of TDS content as 13.7 mg/l and Urilikal recorded a  
147 high value of TDS as 51.9mg/l. A minimum Resistivity value of 2.58 was measured at Kadapilliarthittu and a  
148 maximum 45.6 was measured at Thenkasithodu. A high level of DO was recorded at Thenkasithodu as 6.1mg/l  
149 and  level of DO was recorded at Belikoonda as 0.63 mg/l. Arunkumar *et al.*, (2015) recommended that the  
150 lowest DO recorded at sampling sites is due to organic-rich domestic waste let into the river by the tourists in  
151 the river system. Low value of salinity was recorded at sites viz., Thenkasithodu, Anjurily, Sorrakottaodai,  
152 Naduthotam, Nellithurai, Kovaikutram falls, Puliyarkutti River 8<sup>th</sup> bridge and Puliyarkutti River 3<sup>rd</sup> bridge as  
153 0.01 ppt and a high level of salinity was noted at Kadapilliarthittu as 0.18ppt. Maximum water temperature was  
154 recorded at Pillapara as 33.6°C and a minimum water temperature was noted at Thenkasithodu as 18.9°C.



155

156 Rajan (1955) has studied the fishes of Moyar river system and has reported 48 species. Manimekalan  
157 (1998) has reported 38 species from Mudumalai wildlife sanctuary. Manimekalan has stated that species like  
158 *Labeo dero*, *Puntius mudumaliensis*, *Schimatorhynchus nukta*, *Danio neilgherriensis*, *Crossocheilus latius*  
159 *latius*, *Clarias dayi*, *Gambusia affinis* were restricted to Moyar river system. Also *Clarias dayi* a critically  
160 endangered species has been recorded by Manimekalan (2002). *Puntius carnaticus* and *Danio aequipinnatus* was  
161 recorded as common species of Moyar river system. Rajan (1955) and Mukerjee (1931) has studied the  
162 headwaters of Bhavani river and reported species like *Travancoria elangata*, *Barilius canarensis*, *Rasbora*  
163 *caveri*, *Garra menoni*, *Silurus wynaadensis* were restricted to Bhavani River system. *Puntius filamentosus*,  
164 *Puntius melanampyx*, *Puntius carnaticus*, *Barilius gatensis*, *Danio aequipinnatus*, *Rasbora daniconius* were very  
165 common in Bhavani River System. Arunkumar *et al.*, (2015) has recorded 37 species from Cauvery river  
166 system. Among several fish species recorded, the only *Garra gotyla stenorhynchus* is reclassified as one of the  
167 endangered species in Grand Anicut Cauvery, which is locally consumed (Murthy *et al.*, 2015). But *Garra*  
168 *gotyla stenorhynchus* is still under least concern status of IUCN.

169

170 Silas (1951) in his faunal account discusses the extension of range of *Salmostoma acinaces* (*Chela*  
171 *argentea* Day), *Barbodes carnaticus* (*Barbus* (*Puntius*) *carnaticus*), *Osteochilus* (*Osteochilichthys*) *thomassi* and  
172 *Batasio travancoria* and lists 2 endemic species described by Herre viz. *Homoloptera Montana* and  
173 *Glyptothorax housei*. Silas further reported 5 species from the Cochin part of the Anamalai hills viz. *Barilius*  
174 *bakeri*, *Puntius denisoni*, *Travancoria jonesi*, *Noemacheilus triangularis* and *Batasio travancoria*. *Puntius*  
175 *bimaculatus* earlier considered as a juvenile of *Puntius dorsalis* has been collected from these hills. Interestingly  
176 this species is found to be the most dominant *Puntius* species in the hill ranges of the Eastern Ghats especially  
177 Javadi hills. *Puntius punctatus* earlier considered as a synonym of *Puntius ticto* has been kept as a separate  
178 species and both these species have been collected from Anamalai hills (Menon, 1999).

179

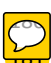

Diversity in the Anamalais is very high except for a few areas such as the Aliyar river basin. The lack  
of diversity in the Aliyar river basin is due to the fact that most of the streams in the area are non-perennial and  
are prone to disturbance/contamination by the local tribal people. This diversity is attributed to the controlled  
fishing activity by locals and protection by Forest officials. The physical environment like forest vegetation,  
riparian vegetation, water temperature, habitat type, and in-stream cover (which provide hiding places for fish)  
play a major role in species diversity and richness.

186

Altitude also plays a major role in species diversity. Colinvaux (1930) proposed the theory of diversity  
that changes with altitude on mountainsides – diversity is lowest at high elevation and vice versa. The present  
finding supports the above theory. The westward flowing Periyar River originates near moolavaigai and reaches  
the Periyar Lake. The Periyar Tiger Reserve is one of the biodiversity rich areas in southern Western Ghats from  
where the Periyar River originates, (Silas 1950, 1952; Kurup *et al.*, 2004). Earliest studies on the fish fauna of  
the PTR dates back to 1948 when Chacko (1948) listed 35 species from the Periyar Lake, including the critically  
endangered small scaled *Schizothoracin Lepidopygopsis typus*. Later Menon & Remadevi (1995) described  
*Hypselobarbus kurali* from streams adjoining the Periyar Lake raising the total number of fish species to 38. In  
the present study 64 species were collected from 31 study sites of six river systems of Southern Western Ghats.

194



195 Species like *Puntius melanampyx*, *Puntius carnaticus*, *Puntius amphibious*, *Puntius fasciatus*, *Puntius*  
196 *mahecola*, *Devario aequipinnatus*, *Garra mullya*, *Travancoria jonesi*, *Nemacheilus guntheri* were commonly  
197 found in all the six river systems (Fig:7).

198

199  has stated that habitat selection of the fishes is influenced by the body structure, food and shelter  
200 and by physiological process. Moreover the fish analyses the characters of the rivers and streams and further  
201 they respond to the characters and helps themselves for the survival of the fittest. Hence it is reliable that the  
202 Micro and Macro habitat plays a key role in the morphology and physiological characters and modifications of  
203 the species. The fish prefers the habitat based on the nature of the rivers or stream substratum type where the  
204 muddy bottom with debris is records for high species richness of the bottom feeders. Odum (1945) well stated  
205 that the flow of the water in the channel is an important factor prevailing the distribution of fishes, the species  
206 like *Barilius*, *Hypselobarbus*, *Puntius*, *Travancoria*, *Rasbora* and *Tor* prefers fast flow. The nature of the  
207 substratum and the flow rate seem to be more or less closely interrelated in governing the distribution of the  
208 fishes. This induces the dominance of the cyprinid species to be well flourished in all the river systems, of the  
209 Southern Western Ghats. It is clear that Ecological structure plays a key role in representing River Systems of  
210 Southern Western Ghats which is flourished with rich species diversity and abundance.

#### 211 4. SUMMARY

212 The morphological-based fish taxonomy is more inconclusive because the micro and macro habitat

 have influenced the morphological variations within the species. In the present study, the fish species were  
215 collected by using different mesh size of gill nets, cast net and dip nets from the long and meandering eastward  
216 flowing river systems of Bhavani, Moyar, Chalakudy, Periyar, Cauvery and Kabini. In the present study a total  
217 of 31 sites of six river systems of Southern Western Ghats were studied in which a total of 64 species belonging  
218 to 6 orders, 14 families and 31 genera were recorded. Among the 64 species *Cyprinidae* was the dominant  
219 family with 3 family 18 genus and 49 species (76.6%) compared to other order and families, further the data  
220 analyses suggested that species belonging to the order Cypriniformes were found to be the dominant species in  
221 the locations considered in the present survey. Interestingly, among the 31 sites Thunakadavu stream,

222 Gulithuraipatti, Athirappalli, Naduthotam, Nadathittu, Mullaithodu, Thonanthikla, Noolpuzha and Sinnaru  
 exhibited high variations in species abundance and as well species richness. Importantly, the present study  
223 clearly documented that altitudes play a major role in species diversities and as well in species abundance. The

224 fish is a healthy and high protein rich food, are in peril in Southern Western Ghats and the comprehensive listing  
225 of various species distribution and continuous monitoring is the most critical need of protection in the present  
226 scenario. It is very apparent to mention that the use of explosives, poisons and fishing of juveniles could be the  
227 primary causes to the sharp decline of the fish population in the study areas. Establishment of sanctuaries,  
228 preservation of genetic materials, awareness programmes and enforcement of laws are some of the short and  
229 long term remedial measures for the efficient conservation of faunal population in Southern Western Ghats.  
230 Social workers, fishermen and local people must also be educated about the importance of conservation of fish  
231 fauna in their area in general, so that the personnel in turn can also make awareness among the people in an  
232 ecological spirit.

233

234



235 **5. ACKNOWLEDGEMENT**

236

237 The authors gratefully acknowledge facilities provided by the Department of Environmental Sciences,  
238 Biodiversity and DNA Barcoding Laboratory, **Palani** University.

239

240 **REFERENCES**

241 Anushiya, J. and Ramachandran A.: Assessment of water availability in Chennai basin under present and future  
242 climate scenarios. Environ Manag River Bas Ecosys. pp 397-415, 2015.

243 APHA.: Standard methods. 19<sup>th</sup> Edition. American Public Health Association Washington, D.C, 1995.

244 Arunachalam, M., Madhusoodanan, K., Nair, C., Vijverberg, J. and Kortmulder, K.: Food and habitat  
245 partitioning among fishes in stream pools of South Indian river. Inter J Ecol and Envi Sci. 23: 271 – 395,  
246 1997.

247 Arunachalam, M., Muralidharan, M. and Sivakumar P.: *Psilorhynchus amplicephalus*, a new species from  
248 Balishwar river of Assam, India. Cur Sci. 92: 1352 – 1354, 2007.

249 Arunachalam, M., Sankaranaraysnan, A., Johnson, J.A., and Manimekalan, A.: Fishes of Nambiyar river,  
250 Kalakkad Mundanthurai Tiger Reserve, Tamil Nadu. J Bom Nat His Soc. 97(1): 153 – 155, 2000.

251 Arunachalam, M., Sivakumar, P. and Muralitharan, M.: Habitat evaluation of pristine headwater streams of  
252 Western Ghats mountain ranges, Peninsular India. New trends in Fishery Development in India. Punjab  
253 University, India, pp. 253 – 286, 2005.

254 Arunkumar A A, Manimekalan A, Manikandan V and Velmurugan P.: Fish species richness and habitat quality  
255 mapping with geographical information system across Cauvery River in Tamil Nadu, India. J Aridlan  
256 Agri, 1: 43-54, 2015.

257 Biju, C.R., Raju Thomas. K. and Ajithkumar C.R.: Fishes of Parambikulam wildlife sanctuary Palakkad  
258 District, Kerala, 1996.

259 Chacko, P.I.: A survey of the fisheries of the Tungabhadra river. Proc. Indian Acad Sci. 28:166-175, 1948

260 Colinvaux, P.A.: Ecology congress cataloging in publication data, 1930.

261 Dahanukar, N., Raut, R. and Bhat, A.: Distribution, endemism and threat status of freshwater fishes in the  
262 Western Ghats of India. J Biogeo, 31 (1): 123-136, 2004.

263 Day, F.: On the fishes of Cochin, on the Malabar Coast of India. Part II. Anacanthini. Proc Zool Soc Lon. 1: 286  
264 – 318, 1865.

265 Day, F.: Monograph of Indian Cyprinidae. Parts 1-3. J Proc Asi Soc Ben. 40(1871): 95 – 143, 1871.



- 266 Day, F.: The fishes of India; being a natural history of fishes known to inhabit the seas and fresh waters of India,  
267 Burma and Ceylon. 4<sup>th</sup> ed. New Delhi, pp. 778,1878.
- 268  I. F.: On the fishes of Cochin, on the Malabar Coast of India. Proc Gen Meet Sci Busi Zool Soc Lon. 33(1):  
269 286 – 318, 1685.
- 270 Gurumurthy G.P. and Tripti M.: Geochemical perspectives on river water of the tropical basins, Southwestern  
271 India. Environ Manag River Bas Ecosys. Heidelberg: Springer International Publishing. p. 329-53, 2015.
- 272 Hamilton - Buchanan, F.: An Account of the Fishes of River Ganges and its Branches. George Ramsay and Co.,  
273 London. pp. vii and 405, 1822.
- 274 Hora, S.L.: Notes on fishes in the Indian Museum on a new species of *Nemacheilus* from the Nilgiri Hills. Rec  
275 Ind Mus. 22: 19 – 21, 1921.
- 276 Hora, S.L.: Notes on fishes in the Indian Museum, on three collections of fish from Mysore and Coorg, South  
277 India. Rec Ind Mus. 39: 5 – 28, 1937.
- 278 Hora, S.L.: Homalopterid fishes from Peninsular India. Rec Ind Mus. XLIII: 211 – 232, 1941.
- 279 Hora, S.L.: Satpura hypothesis of the distribution of Malayan fauna and flora and flora of peninsular India. Proc  
280 Nat Inst Sci Ind. 15: 309 – 314, 1949.
- 281 Hora, S.L. and Misra, K.S.: Fish of Deolali, Part: III. Journal of Bombay Natural History Society. 40: 20 – 38,  
282 1938. 
- 283 Jayaram, K.C.: The Freshwater Fishes of the Indian Region. Nerendra Publishing House, New Delhi. pp. xxvii  
284 and 551, 1999.
- 285 Jayaram, K.C.: The Freshwater Fishes of Indian Region, 2<sup>nd</sup> edition. Narendra Publications, New Delhi. pp. 119,  
286 2010.
- 287 Jerdon, T.C.: On the freshwater fishes of southern India. Mad J Lit Sci. 15 (1848): 141 – 149, 1848.
- 288 Kurup, B.M., Radhakrishnan K.V. and Manojkumar T.G.: Biodiversity status of fishes inhabiting rivers of  
289 Kerala (S. India) with special reference to endemism, threats and conservation measures. Proceedings of  
290 the Second Large Rivers Symposium, Phnom Penh, Kingdom of Cambodia. pp. 163 – 182, 2004.
- 291 Manimekalan, A. and M. Arunachalam.: Rediscovery of critically endangered air birthing cat fish *Clarias dayi*  
292 *hora* (Pisces:Claridae) from Mudumalai Wildlife Sanctuary, Tamil Nadu. J Bom Nat His Soc. 99(1):  
293 129-131, 2002. 
- 294 Manimekalan, A.: Fishes of Mudumalai Wildlife Sanctuary, South India. J Bom Nat His Soc., 95(3): 431 – 443,  
295 1998.
- 296 Manimekalan, A. and Das, H.S.: *Glyptothorax davissinghi* (Pisces: Sisoridae) A new cat fishes from Nilambur  
297 in the Nilgiri Biosphere, South India. J Bom Nat His Soc. 95(1): 87 – 91, 1998.



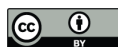

- 298 Manimekalan, A. and Singh.D.F.: New record of *Schismatorhynchus (Nukta) nukta* (Sykes) (Pisces: Cyprinidae)  
299 from Moyar river, extends its range to Tamil Nadu. J Bom Nat His Soc. 94(1): 170 – 171, 1997.
- 300 Menon, A.G.K. and Rema devi, K.: *Hypselobarbus kuali* (pisces: Cyprinidae) a new large barb from the south  
301 western rives of peninsular India. J Bom Nat His Soc. 92: 489 – 393, 1995.
- 302 Menon, A.G.K.: Check list - Fresh water fishes of India. Rec Zool Sur Ind, Occasional Paper. 175: 1 – 366,  
303 1999 
- 304 Menon, A.G.K., and Rema Devi, K.: *Puntius sharmai*, a new cyprinid fish from Madras. J Bom Nat His Soc.  
305 89: 353 – 354, 1992.
- 306 Mukerji, D.D.: On a small collection of fish from the Bhavani river (S.India). J Bom Nat His Soc. 35(1): 162 –  
307 171, 1931.
- 308 Murthy KR, Dhanakumar S, Sundararaj P, Mohanraj R and Kumaraswamy K.: GIS-based modified SINTACS  
309 model for assessing groundwater vulnerability to pollution in Vellore District (Part of Palar River Basin),  
310 Tamil Nadu, India. Environ Manag R Bas Ecosys, 429-53, 2015.
- 311 Odum. H.T.: Primary production in flowing water. Limno Ocea, 1: 102 – 117, 1945.
- 312 Pielou EC.: Ecological Diversity. New York: Wiley, 1975.
- 313 Rajan, S.: Notes on collection of fish from the headwaters of the Bhavani river, South India. J Bom Nat His Soc.  
314 53: 44 – 48, 1955.
- 315 Shannon, C.E. and Weaver. W.: The mathematical theory of communications. Urbaba, University of Illinois  
316 Press, 1949.
- 317 Silas, E.G.: On a collection of fish from Travancore. J Bom Nat His Soc. 48: 792 – 795, 1950.
- 318 Silas, E.G.: On a collection of fish from the Annamalai and Nelliampathi hill ranges, Western Ghats, with a  
319 note on its zoogeographical significance. J Bom Nat His Soc. XLIX: 470 – 481, 1951.
- 320 Silas, E.G.: Fishes from the high ranges of Travancore. J Bom Nat His Soc. 50: 323 – 330, 1952.
- 321 Simpson, G.G.: Measurement of diversity, Nature. 136. pp. 688, 1949.
- 322 Southwood T R.: Ecological Methods. London: Chapmam and Hall, 1978.
- 323 Talwar, P.K. and Jhingran, A.G.: Inland fishes of India and adjacent countries. Vol. I, Oxford & IBH Publishing  
324 Co. Pvt. Ltd, New Delhi, pp. 541, 1991.
- 325 Thomas J, Joseph S, Thrivikramji K. P.: Hydrogeochemical drivers and processes controlling solute chemistry  
326 of two Mountain River basins of contrasting climates in the Southern Western Ghats, India. Environ  
327 Manage River Bas Ecosys. pp 355-396, 2015.



**Table 1: Study site and its Habitat character**

| S. No                         | Study site                          | Latitude and longitude  | Altitude | Forest type    | Stream order | Stream Width (m) | Stream Depth (m) | Area (m <sup>2</sup> ) | Volume (m <sup>3</sup> ) | Mean Velocity (m/sec) |
|-------------------------------|-------------------------------------|-------------------------|----------|----------------|--------------|------------------|------------------|------------------------|--------------------------|-----------------------|
| <b>Moyar River System</b>     |                                     |                         |          |                |              |                  |                  |                        |                          |                       |
| 1                             | Gulithuraipatti                     | 11° 36' N and 76° 47' E | 312      | Thorn forest   | 4            | 10               | 6                | 1000                   | 6000                     | 4                     |
| 2                             | Kallampalayam                       | 11° 31' N and 77° 0' E  | 300      | Thorn forest   | 4            | 13               | 8                | 1300                   | 10400                    | 4                     |
| 3                             | Belemeenthurai                      | 11° 36' N and 76° 47' E | 520      | Dry deciduous  | 4            | 19               | 1.75             | 1900                   | 3325                     | 4                     |
| <b>Chalakydy River System</b> |                                     |                         |          |                |              |                  |                  |                        |                          |                       |
| 4                             | Orukomban range                     | 10° 22' N and 76° 39' E | 450      | Dry deciduous  | 4            | 6                | 0.5              | 600                    | 300                      | 3                     |
| 5                             | Thenmudiparai                       | 10° 24' N and 76° 36' E | 510      | Dry deciduous  | 5            | 25               | 1.5              | 2500                   | 3750                     | 3                     |
| 6                             | Baghapallam                         | 10° 27' N and 76° 43' E | 748      | Dry deciduous  | 5            | 8                | 0.5              | 800                    | 400                      | 3                     |
| 7                             | Theilikal                           | 10° 27' N and 76° 44' E | 840      | Dry deciduous  | 4            | 4                | 1.0              | 400                    | 400                      | 3                     |
| 8                             | Puliyarkutti 8 <sup>th</sup> bridge | 10° 23' N and 76° 40' E | 527      | Dry deciduous  | 4            | 19.2             | 1.2              | 1920                   | 2304                     | 3                     |
| 9                             | Puliyarkutti 3 <sup>rd</sup> bridge | 10° 23' N and 76° 41' E | 512      | Dry deciduous  | 4            | 37               | 1.5              | 3700                   | 5550                     | 3                     |
| 10                            | Thunakadavu stream                  | 10° 25' N and 76° 46' E | 510      | Dry deciduous  | 4            | 13.6             | 0.5              | 1360                   | 680                      | 3                     |
| 11                            | Thunakadavu tunnel                  | 10° 20' N and 76° 34' E | 520      | Dry deciduous  | 5            | 15               | 10               | 1500                   | 15000                    | 5                     |
| 12                            | Urlikal                             | 10° 19' N and 76° 53' E | 3238     | Dry deciduous  | 2            | 7                | 1.5              | 700                    | 1050                     | 2                     |
| 13                            | Athirappalli                        | 10° 18' E and 76° 34' N | 202      | Semi evergreen | 4            | 8                | 3                | 800                    | 2400                     | 4                     |
| 14                            | Pillapara                           | 11° 36' N and 76° 47' E | 267      | Semi evergreen | 4            | 5                | 2                | 500                    | 1000                     | 4                     |



| <b>Bhavani River System</b> |                      |                         |      |                |   |      |     |      |       |   |
|-----------------------------|----------------------|-------------------------|------|----------------|---|------|-----|------|-------|---|
| 15                          | Kovaikultralam falls | 10° 56' N and 76°41' E  | 560  | Semi evergreen | 2 | 5    | 1.2 | 500  | 600   | 4 |
| 16                          | Nelhthurai           | 11° 17' N and 76°53' E  | 380  | Thorn forest   | 4 | 27   | 1.1 | 2700 | 2970  | 5 |
| <b>Periyar River System</b> |                      |                         |      |                |   |      |     |      |       |   |
| 17                          | Oorpannikaham        | 09° 28' N and 77°16' E  | 884  | Evergreen      | 4 | 12   | 2.1 | 1200 | 2520  | 2 |
| 18                          | Valukuparai          | 09° 28' N and 77°17' E  | 869  | Evergreen      | 4 | 7.5  | 0.3 | 750  | 225   | 3 |
| 19                          | Melaparai            | 09° 26' E and 77° 18' N | 965  | Evergreen      | 4 | 11   | 4.2 | 1100 | 4620  | 3 |
| 20                          | Naduthotam           | 09° 26' N and 77° 19' E | 950  | Evergreen      | 4 | 7.5  | 0.3 | 750  | 225   | 3 |
| 21                          | Ummikuppamthodu      | 09° 28' N and 77° 14' E | 943  | Evergreen      | 4 | 5    | 3.0 | 500  | 1500  | 4 |
| 22                          | Sorrakottaodai       | 09° 28' N and 77° 15' E | 879  | Evergreen      | 4 | 7    | 1.5 | 700  | 1050  | 3 |
| 23                          | Mullaitthodu         | 09° 31' N and 77° 16' E | 869  | Evergreen      | 4 | 10   | 0.6 | 1000 | 600   | 3 |
| 24                          | Anjurily             | 11° 36' N and 76°47' E  | 912  | Evergreen      | 4 | 20   | 5   | 2000 | 10000 | 2 |
| 25                          | Thenkasithodu        | 11° 36' N and 76°47' E  | 872  | Evergreen      | 4 | 11.3 | 0.5 | 1130 | 565   | 2 |
| <b>Cauvery River System</b> |                      |                         |      |                |   |      |     |      |       |   |
| 26                          | Kadapillyarthittu    | 12° 07' N and 77° 46' E | 1137 | Dry deciduous  | 4 | 75   | 1.5 | 7500 | 11250 | 2 |
| 27                          | Belikoonda           | 12° 11' N and 77° 43' E | 267  | Dry deciduous  | 4 | 80   | 10  | 8000 | 80000 | 5 |
| 28                          | Nadathittu           | 12° 08' E and 77° 44' N | 262  | Dry deciduous  | 4 | 70   | 6   | 7000 | 42000 | 3 |
| 29                          | Sinnaru              | 12° 06' N and 77° 46' E | 225  | Dry deciduous  | 4 | 55   | 0.5 | 5500 | 2750  | 3 |
| 30                          | Thonanthikla         | 12° 07' N and 76° 46' E | 341  | Dry deciduous  | 4 | 25   | 1   | 2500 | 2500  | 4 |
| <b>Nugu River System</b>    |                      |                         |      |                |   |      |     |      |       |   |
| 31                          | Noolpuzha            | 11° 41' N and 76° 23' E | 2810 | Semi evergreen | 3 | 25   | 4.1 | 2500 | 10250 | 4 |

\*Velocity (m/sec): 1. Very slow (<0.05); 2. Slow (0.05-0.2); 3. Moderate (0.2-0.5); 4. Fast (0.5-1.0); 5. Very fast (>1).



Figure 2: List of Freshwater Fauna recorded during the present study

| S.no | Species                             | Distribution locations | IUCN |
|------|-------------------------------------|------------------------|------|
|      | <b>Order: Cypriniformes</b>         |                        |      |
|      | <b>Family: Cyprinidae</b>           |                        |      |
|      | <b>Sub - Family: Cyprininae</b>     |                        |      |
| 1    | <i>Puntius melanampyx</i>           | 18                     | DD   |
| 2    | <i>Puntius carnaticus</i>           | 10                     | LC   |
| 3    | <i>Puntius amphibius</i>            | 4                      | DD   |
| 4    | <i>Haludaria fasciatus</i>          | 11                     | LC   |
| 5    | <i>Dawlinsia filamentosus</i>       | 4                      | LC   |
| 6    | <i>Puntius sarana sarana</i>        | 4                      | LC   |
| 7    | <i>Puntius dorsalis</i>             | 2                      | LC   |
| 8    | <i>Puntius chola</i>                | 2                      | LC   |
| 9    | <i>Puntius sophore</i>              | 1                      | LC   |
| 10   | <i>Eechathalakenda ophicephalus</i> | 2                      | EN   |
| 11   | <i>Puntius mahecola</i>             | 7                      | DD   |
| 12   | <i>Pethia conconius</i>             | 4                      | LC   |
| 13   | <i>Sahyadria denisonii</i>          | 2                      | EN   |
| 14   | <i>Sahyadria chalakudiensis</i>     | 2                      | EN   |
| 15   | <i>Puntius sarana spirulus</i>      | 1                      | LC   |
| 16   | <i>Puntius bimaculatus</i>          | 3                      | LC   |
| 17   | <i>Pethia ticto</i>                 | 1                      | LC   |
| 18   | <i>Cirrhinus cirrhosus</i>          | 2                      | VU   |
| 19   | <i>Skymatorynchus nukta</i>         | 3                      | EN   |
| 20   | <i>Labeo boggut</i>                 | 1                      | LC   |
| 21   | <i>Labeo kontius</i>                | 1                      | LC   |
| 22   | <i>Labeo ariza</i>                  | 3                      | LC   |
| 23   | <i>Labeo calbasu</i>                | 2                      | LC   |
| 24   | <i>Labeo boga</i>                   | 2                      | LC   |



|    |                                    |    |    |
|----|------------------------------------|----|----|
| 25 | <i>Hypsilobarbus curmuca</i>       | 4  | EN |
| 26 | <i>Hypsilobarbus periyarensis</i>  | 3  | EN |
| 27 | <i>Hypsilobarbus dubius</i>        | 6  | EN |
| 28 | <i>Tor malabaricus</i>             | 5  | EN |
| 29 | <i>Tor kudhree</i>                 | 9  | EN |
| 30 | <i>Osteochilus longidorsalis</i>   | 2  | EN |
|    | <b>Sub - Family: Danioninae</b>    |    |    |
| 31 | <i>Salmophasia acinaces</i>        | 1  | LC |
| 32 | <i>Barilius gatensis</i>           | 16 | LC |
| 33 | <i>Barilius bakeri</i>             | 10 | LC |
| 34 | <i>Barilius barana</i>             | 2  | LC |
| 35 | <i>Barilius bendelisis</i>         | 3  | LC |
| 36 | <i>Devario aequipinnatus</i>       | 21 | LC |
| 37 | <i>Rasbora daniconius</i>          | 13 | LC |
|    | <b>Sub - Family: Oreininae</b>     |    |    |
| 38 | <i>Lepiphygopsis typus</i>         | 2  | EN |
|    | <b>Sub - Family: Garrinae</b>      |    |    |
| 39 | <i>Garra mullya</i>                | 16 | LC |
| 40 | <i>Garra surendranathi</i>         | 3  | EN |
| 41 | <i>Garra nastuta</i>               | 1  | LC |
| 42 | <i>Garra periyarensis</i>          | 2  | VU |
| 43 | <i>Garra hughi</i>                 | 3  | EN |
| 44 | <i>Garra gotyola stenorynchus</i>  | 2  | LC |
| 45 | <i>Crossocheilus latius latius</i> | 1  | LC |
|    | <b>Family: Balitoridae</b>         |    |    |
|    | <b>Sub - Family: Balitorinae</b>   |    |    |
| 46 | <i>Travancoria jonesi</i>          | 8  | EN |
|    | <b>Sub - Family: Nemacheilinae</b> |    |    |
| 47 | <i>Nemacheilus dennisoni</i>       | 2  | LC |
| 48 | <i>Nemacheilus guntheri</i>        | 7  | LC |

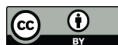

|    |                                      |   |    |
|----|--------------------------------------|---|----|
|    | <b>Family: Cobitidae</b>             |   |    |
|    | <b>Sub - Family: Cobitinae</b>       |   |    |
| 49 | <i>Lepidocephalus thermalis</i>      | 5 | LC |
|    | <b>Order: Siluriformes</b>           |   |    |
|    | <b>Family: Bagridae</b>              |   |    |
|    | <b>Sub - Family: Bagrinae</b>        |   |    |
| 50 | <i>Hemibagrus punctatus</i>          | 3 | CR |
| 51 | <i>Mystus cavasius</i>               | 4 | LC |
|    | <b>Family: Siluridae</b>             |   |    |
| 52 | <i>Ompok bimaculatus</i>             | 1 | NT |
|    | <b>Family: Sisoridae</b>             |   |    |
|    | <b>Sub - Family: Glyptosterninae</b> |   |    |
| 53 | <i>Glyptothorax housei</i>           | 1 | EN |
|    | <b>Order: Cyprinodontiformes</b>     |   |    |
|    | <b>Family: Aplocheilidae</b>         |   |    |
|    | <b>Sub - Family: Aplocheilinae</b>   |   |    |
| 54 | <i>Aplocheilus lineatus</i>          | 3 | LC |
|    | <b>Order: Synbranchiformes</b>       |   |    |
|    | <b>Sub- order: Mastacembeloidei</b>  |   |    |
|    | <b>Family: Mastacembelidae</b>       |   |    |
|    | <b>Sub - Family: Mastacembelinae</b> |   |    |
| 55 | <i>Macroganthus pancalus</i>         | 1 | LC |
| 56 | <i>Mastacembelus armatus</i>         | 1 | LC |
|    | <b>Order: Perciformes</b>            |   |    |
|    | <b>Sub- order: Percoidei</b>         |   |    |
|    | <b>Family: Ambassidae</b>            |   |    |
| 57 | <i>Chanda nama</i>                   | 2 | LC |
|    | <b>Family: Pristolepididae</b>       |   |    |
| 58 | <i>Pristolepis marignata</i>         | 3 | LC |
|    | <b>Sub- order: Labroidei</b>         |   |    |



|    |                               |   |    |
|----|-------------------------------|---|----|
|    | <b>Family: Cichlidae</b>      |   |    |
| 59 | <i>Oreochromis mosambica</i>  | 1 | NT |
| 60 | <i>Etroplus suratensis</i>    | 3 | LC |
| 61 | <i>Etroplus maculatus</i>     | 2 | LC |
|    | <b>Sub- order: Gobioidi</b>   |   |    |
|    | <b>Family: Gobiidae</b>       |   |    |
|    | <b>Sub - Family: Gobiinae</b> |   |    |
| 62 | <i>Glossogobius guiris</i>    | 1 | LC |
|    | <b>Order: Mugiliformes</b>    |   |    |
|    | <b>Sub- order: Belonoidei</b> |   |    |
|    | <b>Family: Belonidae</b>      |   |    |
| 63 | <i>Xenetodon cancilia</i>     | 3 | LC |
|    | <b>Family: Hemiramphidae</b>  |   |    |
| 64 | <i>Hyporhamphus limbatus</i>  | 2 | LC |

\* EX – Extinct; EW – Extinct in the Wild; CR – Critically Endangered; EN – Endangered; VU – Vulnerable; NT – Near Threatened; LRnt – Low Risk near threatened; LRlc – Low Risk least concern; LRcd – Low Risk conservation dependent; DD – Data Deficient.

**Figure 3: Indices of diversity of fishes respective to altitudes of six river systems**

| Sampling Locations      | Diversity (H') | Evenness (E) | Abundance | Richness (S) | Dominance (D) |
|-------------------------|----------------|--------------|-----------|--------------|---------------|
| Gulithuraipatti         | 0.769          | 0.769        | 62        | 10           | 5.016         |
| Kallampalayam           | 0.62           | 0.686        | 38        | 8            | 3.316         |
| Belemeenthurai          | 0.841          | 0.932        | 19        | 8            | 8.55          |
| Orukomban range         | 0.711          | 0.842        | 49        | 7            | 4.576         |
| Thenmudiparai           | 0.74           | 0.875        | 59        | 7            | 4.833         |
| Baghapallam             | 0.617          | 0.793        | 36        | 6            | 3.728         |
| Thekkikal               | 0.805          | 0.843        | 32        | 9            | 5.701         |
| Puliyarkutti 8th bridge | 0.879          | 0.921        | 39        | 9            | 7.8           |
| Puliyarkutti 3rd bridge | 0.401          | 0.841        | 17        | 3            | 2.429         |



|                    |       |       |     |    |        |
|--------------------|-------|-------|-----|----|--------|
| Thunakadavu stream | 0.864 | 0.864 | 68  | 10 | 6.026  |
| Thunakadavu tunnel | 0.357 | 0.748 | 42  | 3  | 2.121  |
| Urilikal           | 0.734 | 0.869 | 131 | 7  | 4.598  |
| Athirappalli       | 1.01  | 0.936 | 52  | 12 | 11.143 |
| Pillapara          | 0.718 | 0.923 | 25  | 6  | 5.769  |
| Kovaiutralam falls | 0.722 | 0.928 | 40  | 6  | 5      |
| Nellithurai        | 0.757 | 0.896 | 29  | 7  | 5.639  |
| Oorpannikaham      | 0.767 | 0.849 | 27  | 8  | 5.4    |
| Valukuparai        | 0.91  | 0.954 | 28  | 9  | 9.947  |
| Melaparai          | 0.798 | 0.944 | 19  | 7  | 7.773  |
| Naduthotam         | 1.019 | 0.915 | 152 | 13 | 9.936  |
| Tmmikuppamthodu    | 0.527 | 0.678 | 41  | 6  | 2.384  |
| Sorrakottaodai     | 0.465 | 0.976 | 16  | 3  | 3.243  |
| Mullaithodu        | 1.045 | 0.968 | 48  | 12 | 12.966 |
| Anjurily           | 0.537 | 0.768 | 19  | 5  | 3.054  |
| Thenkasithodu      | 0.638 | 0.668 | 100 | 9  | 3.327  |
| Kadapilliyarthittu | 0.8   | 0.886 | 37  | 8  | 6.055  |
| Belikoonda         | 0.625 | 0.804 | 16  | 6  | 3.75   |
| Nadathittu         | 1.198 | 0.921 | 77  | 20 | 15.481 |
| Sinnaru            | 1.268 | 0.959 | 75  | 21 | 21.346 |
| Thonanthikla       | 1.069 | 0.909 | 46  | 15 | 11.129 |
| Noolpuzha          | 0.946 | 0.946 | 78  | 10 | 8.938  |





**Figure 4: Species composition among the 31 sites**

| Cluster no | Cluster between | Study sites                                                                                                                                                                                                                                                                                                                            |
|------------|-----------------|----------------------------------------------------------------------------------------------------------------------------------------------------------------------------------------------------------------------------------------------------------------------------------------------------------------------------------------|
| 1          | 1 - 4           | Thunakadavu stream, Baghapallam, Kallampalayam, Thunakadavu tunnel                                                                                                                                                                                                                                                                     |
| 2          | 5 -7            | Thenmudiparai, Orukomban range, Gulithuraipatti                                                                                                                                                                                                                                                                                        |
| 3          | 8 - 28          | Melaparai, Valukuparai, Belemeenthurai, Anjurily, Oorpannikaham, Nellithurai, Belikoondu, Kadapilliyarthittu, Sorrakottaodai, Puliarkutti 3 <sup>rd</sup> bridge, Mullaithodu, Kovaikutram falls, Puliarkutti 8 <sup>th</sup> bridge, Sinnaru, Nadathittu, Thonanthikla, Thellikal, Pillapara, Athirapalli, Noolpuzha, Ummikuppamthodu |
| 4          | 29              | Naduthotam                                                                                                                                                                                                                                                                                                                             |
| 5          | 30              | Thenkasithodu                                                                                                                                                                                                                                                                                                                          |
| 6          | 31              | Urilikal                                                                                                                                                                                                                                                                                                                               |



**Table 5: Distribution and abundance of fishes of six river systems**

| S.no | Collection sites (Collection site number as in Table 1) |    |   |   |   |    |   |    |    |    |    |    |    |    |    |    |    |    |    |    |    |    |    |    |    |    |    |    |    |    |    |    |
|------|---------------------------------------------------------|----|---|---|---|----|---|----|----|----|----|----|----|----|----|----|----|----|----|----|----|----|----|----|----|----|----|----|----|----|----|----|
|      | 1                                                       | 2  | 3 | 4 | 5 | 6  | 7 | 8  | 9  | 10 | 11 | 12 | 13 | 14 | 15 | 16 | 17 | 18 | 19 | 20 | 21 | 22 | 23 | 24 | 25 | 26 | 27 | 28 | 29 | 30 | 31 |    |
| 1    |                                                         |    |   | 4 | 6 | 12 | 7 | 10 | 5  | 11 | 32 | 5  | 2  | 5  |    |    |    | 2  | 2  |    |    | 5  | 4  | 5  |    |    |    |    |    |    |    | 10 |
| 2    | 1                                                       | 1  | 5 |   |   |    | 1 | 2  | 6  |    |    |    |    |    |    |    |    |    |    |    |    |    |    | 4  |    |    |    |    |    |    |    |    |
| 3    | 1                                                       | 2  |   |   |   |    | 1 |    |    |    |    |    |    |    |    |    |    |    |    |    |    |    |    |    |    |    |    |    |    |    |    |    |
| 4    |                                                         |    |   |   |   |    |   | 5  | 10 | 5  | 13 |    |    |    | 15 | 1  | 1  | 2  |    |    |    | 4  | 5  |    |    |    |    |    |    |    |    | 15 |
| 5    | 1                                                       |    |   |   |   |    |   |    |    |    |    |    |    |    |    |    |    |    |    |    |    |    |    |    |    |    |    |    |    |    |    |    |
| 6    | 15                                                      | 1  |   |   |   |    |   |    |    |    |    |    |    |    |    | 10 |    |    |    |    |    |    |    |    |    |    |    |    |    |    |    |    |
| 7    | 1                                                       | 1  |   |   |   |    |   |    |    |    |    |    |    |    |    |    |    |    |    |    |    |    |    |    |    |    |    |    |    |    |    |    |
| 8    | 7                                                       | 15 |   |   |   |    |   |    |    |    |    |    |    |    |    |    |    |    |    |    |    |    |    |    |    |    |    |    |    |    |    |    |
| 9    |                                                         |    |   |   |   |    |   |    |    |    | 11 |    |    |    |    |    |    |    |    |    |    |    |    |    |    |    |    |    |    |    |    |    |
| 10   |                                                         |    |   |   |   |    |   |    |    |    |    |    |    |    |    |    |    |    |    | 19 | 26 |    |    |    |    |    |    |    |    |    |    |    |
| 11   |                                                         |    |   |   |   |    |   |    |    | 25 |    | 8  | 5  | 5  |    |    |    |    |    |    |    |    |    |    |    |    |    |    |    |    |    |    |
| 12   |                                                         |    |   |   |   |    |   |    |    |    |    |    |    |    |    |    |    |    |    |    |    |    |    |    |    |    | 4  | 3  | 3  |    |    |    |
| 13   |                                                         |    |   |   |   |    |   |    |    |    |    | 5  | 5  |    |    |    |    |    |    |    |    |    |    |    |    | 10 | 1  | 3  | 4  |    |    |    |
| 14   |                                                         |    |   |   |   |    |   |    |    |    |    | 1  | 1  |    |    |    |    |    |    |    |    |    |    |    |    |    |    |    |    |    |    |    |
| 15   |                                                         |    |   |   |   |    |   |    |    |    |    |    |    |    |    |    | 3  |    |    |    |    |    |    |    |    |    |    |    |    |    |    |    |
| 16   |                                                         |    |   |   |   |    |   |    |    |    |    |    |    |    |    |    |    |    |    |    |    |    |    |    |    | 2  |    |    |    |    |    |    |
| 17   |                                                         | 1  |   |   |   |    |   |    |    |    | 10 |    |    |    |    |    |    |    |    |    |    |    |    |    |    |    |    |    |    |    |    |    |
| 18   |                                                         |    |   |   |   |    |   |    |    |    |    |    |    |    |    |    |    |    |    |    |    |    |    |    |    |    |    |    |    |    |    |    |
| 19   |                                                         |    |   |   |   |    |   |    |    |    |    |    |    |    |    | 2  |    |    |    |    |    |    |    |    |    |    |    |    |    |    |    |    |
| 20   |                                                         |    |   |   |   |    |   |    |    |    |    |    |    |    |    |    |    |    |    |    |    |    |    |    |    |    |    |    |    |    |    |    |
| 21   |                                                         |    |   |   |   |    |   |    |    |    |    |    |    |    |    |    |    |    |    |    |    |    |    |    |    |    |    |    |    |    |    |    |
| 22   |                                                         |    |   |   |   |    |   |    |    |    |    |    |    |    |    |    |    |    |    |    |    |    |    |    |    |    |    |    |    |    |    |    |
| 23   |                                                         |    |   |   |   |    |   |    |    |    |    |    |    |    |    |    |    |    |    |    |    |    |    |    |    |    |    |    |    |    |    |    |
| 24   |                                                         |    |   |   |   |    |   |    |    |    |    |    |    |    |    |    |    |    |    |    |    |    |    |    |    |    |    |    |    |    |    |    |
| 25   |                                                         |    |   | 2 |   |    |   |    |    |    |    |    |    |    |    | 1  |    |    |    |    |    |    |    |    |    |    |    |    |    |    |    |    |
| 26   |                                                         |    |   |   |   |    |   |    |    |    |    |    |    |    |    |    |    |    |    |    |    |    |    |    |    |    |    |    |    |    |    |    |
| 27   |                                                         |    |   | 1 |   |    |   |    |    |    |    |    |    |    |    |    |    |    |    |    |    |    |    |    |    |    |    |    |    |    |    |    |
| 28   |                                                         |    |   |   |   |    |   |    |    |    |    |    |    |    |    |    |    |    |    |    |    |    |    |    |    |    |    |    |    |    |    |    |
| 29   |                                                         |    |   |   |   |    |   |    |    |    |    |    |    |    |    |    |    |    |    |    |    |    |    |    |    |    |    |    |    |    |    |    |
| 30   |                                                         |    |   |   |   |    |   |    |    |    |    |    |    |    |    |    |    |    |    |    |    |    |    |    |    |    |    |    |    |    |    |    |
| 31   |                                                         |    |   |   |   |    |   |    |    |    |    |    |    |    |    |    |    |    |    |    |    |    |    |    |    |    |    |    |    |    |    |    |



Table 6:  Water quality of 31 study sites of six river systems

|  ex | pH   | Conductivity (mS) | TDS (ppm) | Resistivity (K $\Omega$ ) | DO (mg/L) | Salinity (ppt) | Water temperature ( $^{\circ}$ C) |
|--------------------------------------------------------------------------------------|------|-------------------|-----------|---------------------------|-----------|----------------|-----------------------------------|
| Gulithuraipatti                                                                      | 8.4  | 57.8              | 20.37     | 24.2                      | 3.5       | 0.03           | 23.8                              |
| Kallampalayam                                                                        | 7.9  | 45.2              | 28.5      | 21.9                      | 2.5       | 0.02           | 24.1                              |
| Belemeenthurai                                                                       | 8.4  | 59.2              | 37.7      | 16.4                      | 1.3       | 0.03           | 24.5                              |
| Orukomban range                                                                      | 7.5  | 33.9              | 26.5      | 22.4                      | 3.5       | 0.02           | 23.4                              |
| Thenmudiparai                                                                        | 8    | 45.2              | 28.5      | 21.9                      | 2.5       | 0.02           | 24.1                              |
| Baghapallam                                                                          | 8    | 57.8              | 38.0      | 16.8                      | 2.4       | 0.03           | 21.7                              |
| Theellikal                                                                           | 8.8  | 59.2              | 37.7      | 16.4                      | 1.3       | 0.03           | 24.5                              |
| Puliyarkutti 8 <sup>th</sup> bridge                                                  | 7.79 | 27.8              | 18.0      | 34.8                      | 5.4       | 0.01           | 23.5                              |
| Puliyarkutti 3 <sup>rd</sup> bridge                                                  | 7.79 | 27.8              | 18.0      | 34.8                      | 5.4       | 0.01           | 23.5                              |
| Thunakadavu stream                                                                   | 5.9  | 38.3              | 28.3      | 22.2                      | 5.09      | 0.02           | 21.4                              |
| Thunakadavu tunnel                                                                   | 5.9  | 38.3              | 28.3      | 22.2                      | 5.09      | 0.02           | 21.4                              |
| Urilikal                                                                             | 7.2  | 78.7              | 51.9      | 12.9                      | 1.4       | 0.03           | 24.1                              |
| Athirappalli                                                                         | 7.2  | 35.2              | 47.5      | 3.97                      | 0.73      | 0.02           | 32.7                              |
| Pillapara                                                                            | 7.6  | 34.0              | 19.5      | 29.9                      | 0.89      | 0.02           | 33.6                              |
| Kovaikutralam falls                                                                  | 7.5  | 31.3              | 20.1      | 32.3                      | 3.2       | 0.01           | 22.5                              |
| Nellithurai                                                                          | 7.3  | 30.3              | 20.3      | 31.5                      | 2.3       | 0.01           | 25.5                              |
| Oorpannikaham                                                                        | 8.3  | 50.3              | 32.3      | 20.0                      | 1.2       | 0.02           | 24.8                              |
| Valukuparai                                                                          | 7.7  | 66.9              | 43.8      | 15.1                      | 0.7       | 0.03           | 24.8                              |
| Melaparai                                                                            | 9    | 44.7              | 28.8      | 22.5                      | 1.3       | 0.02           | 26.1                              |
| Naduthotam                                                                           | 7.5  | 46.2              | 30.4      | 20.6                      | 0.7       | 0.01           | 25.9                              |
| Ummikuppamthodu                                                                      | 7.7  | 64.9              | 43.2      | 17.1                      | 1.2       | 0.03           | 24.8                              |
| Sorakottaodai                                                                        | 8    | 34.2              | 21.9      | 29.5                      | 1.1       | 0.01           | 23.1                              |
| Mullaithodu                                                                          | 8.1  | 78.6              | 51.4      | 12.5                      | 0.9       | 0.04           | 24.2                              |
| Anjurily                                                                             | 7.2  | 21.5              | 13.6      | 47.5                      | 4.86      | 0.01           | 19.2                              |
| Thenkasithodu                                                                        | 5.2  | 22.0              | 13.7      | 45.6                      | 6.11      | 0.01           | 18.9                              |
| Kadapilliyarthittu                                                                   | 9.6  | 39.1              | 26.3      | 2.58                      | 0.72      | 0.18           | 30.5                              |
| Belikoonda                                                                           | 9.4  | 39.8              | 26.3      | 2.63                      | 0.63      | 0.17           | 32.7                              |
| Nadathittu                                                                           | 9.4  | 39.8              | 26.3      | 2.63                      | 0.63      | 0.17           | 32.7                              |
| Sinnaru                                                                              | 9.2  | 39.5              | 26.3      | 2.65                      | 3.11      | 0.11           | 30.2                              |
| Thonanthikla                                                                         | 9.2  | 39.5              | 26.3      | 2.65                      | 3.11      | 0.11           | 30.2                              |
| Noolpuzha                                                                            | 7.32 | 85.2              | 51.7      | 11.8                      | 3.62      | 0.04           | 23.2                              |

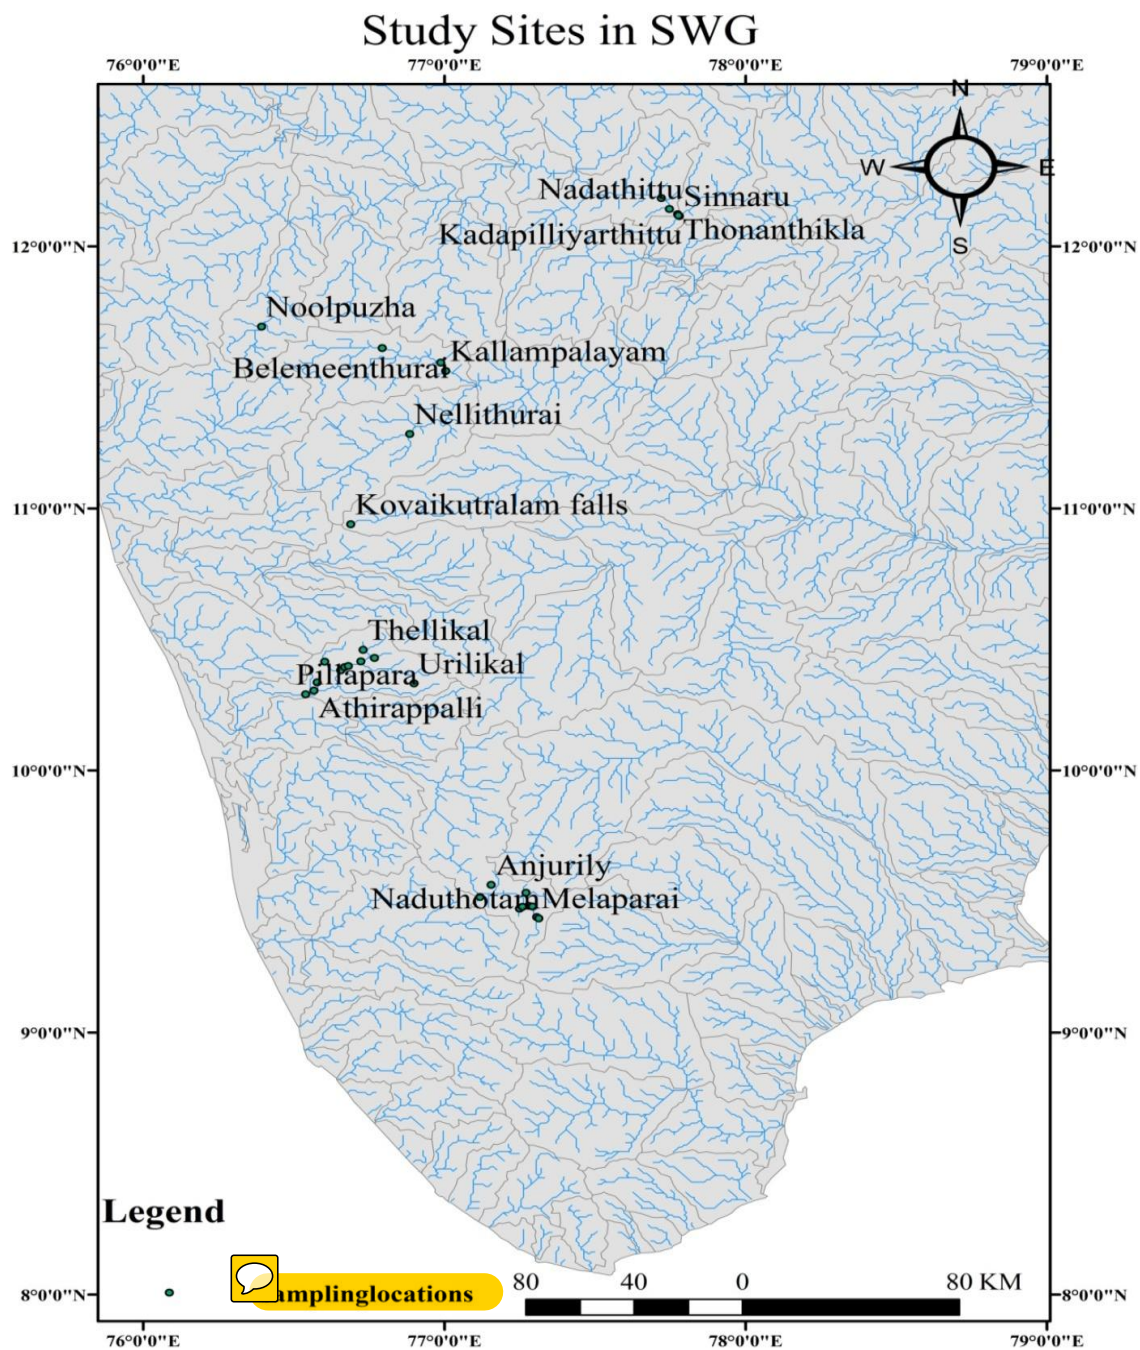

Fig 1: Collection location of six river systems

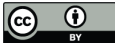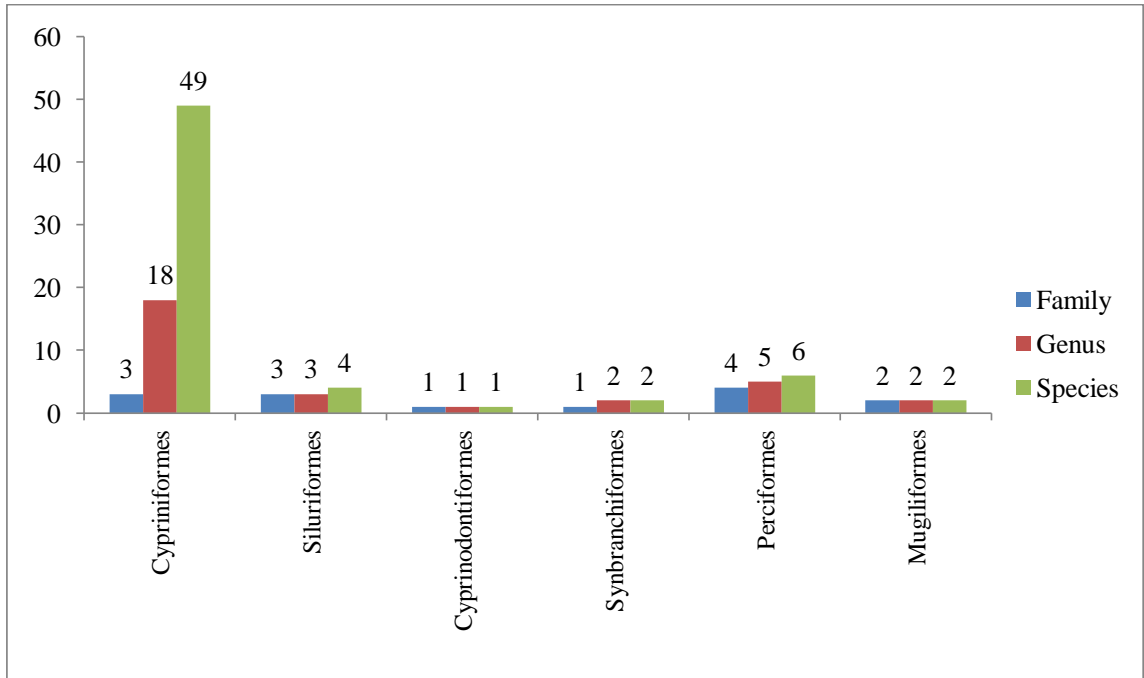

Fig. 2. Representation of fishes in different order

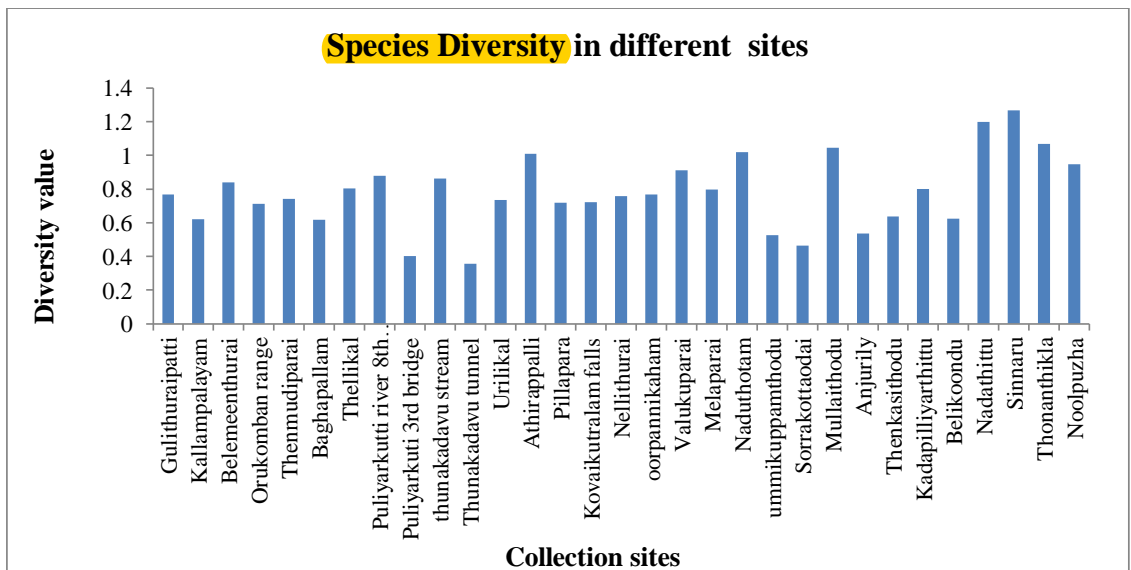

Species diversity in among 31 sites

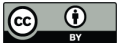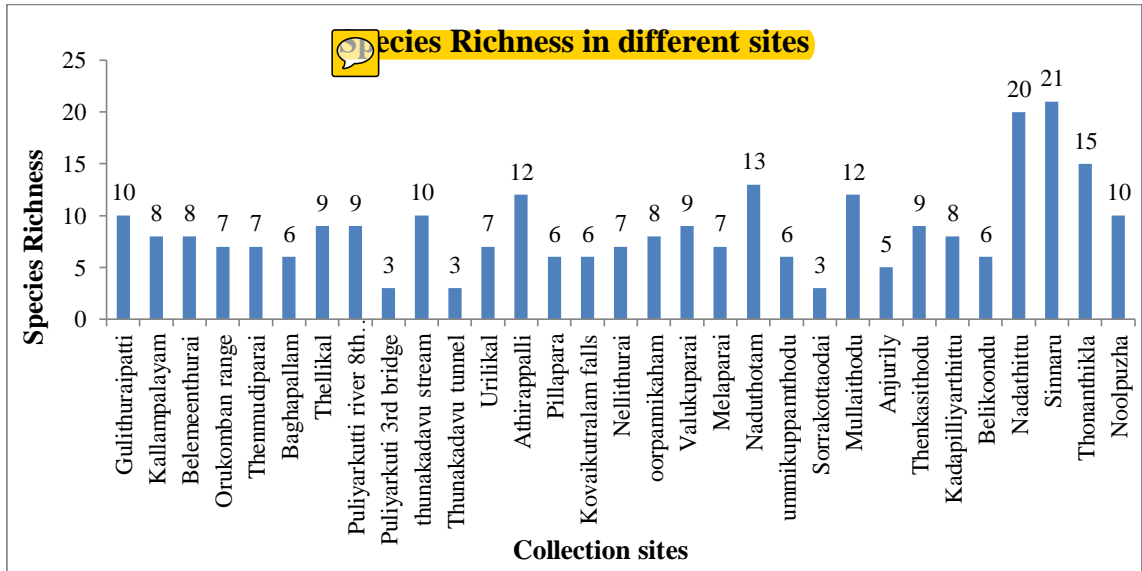

Fig 4: Species richness among 31 sites

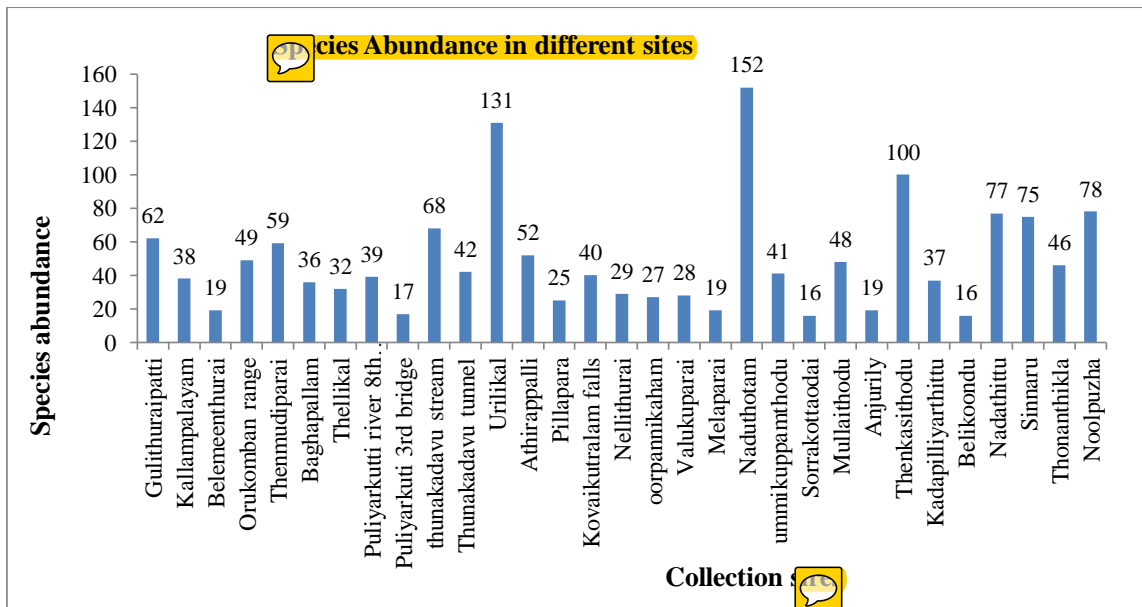

Species abundance in among 31 sites

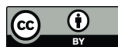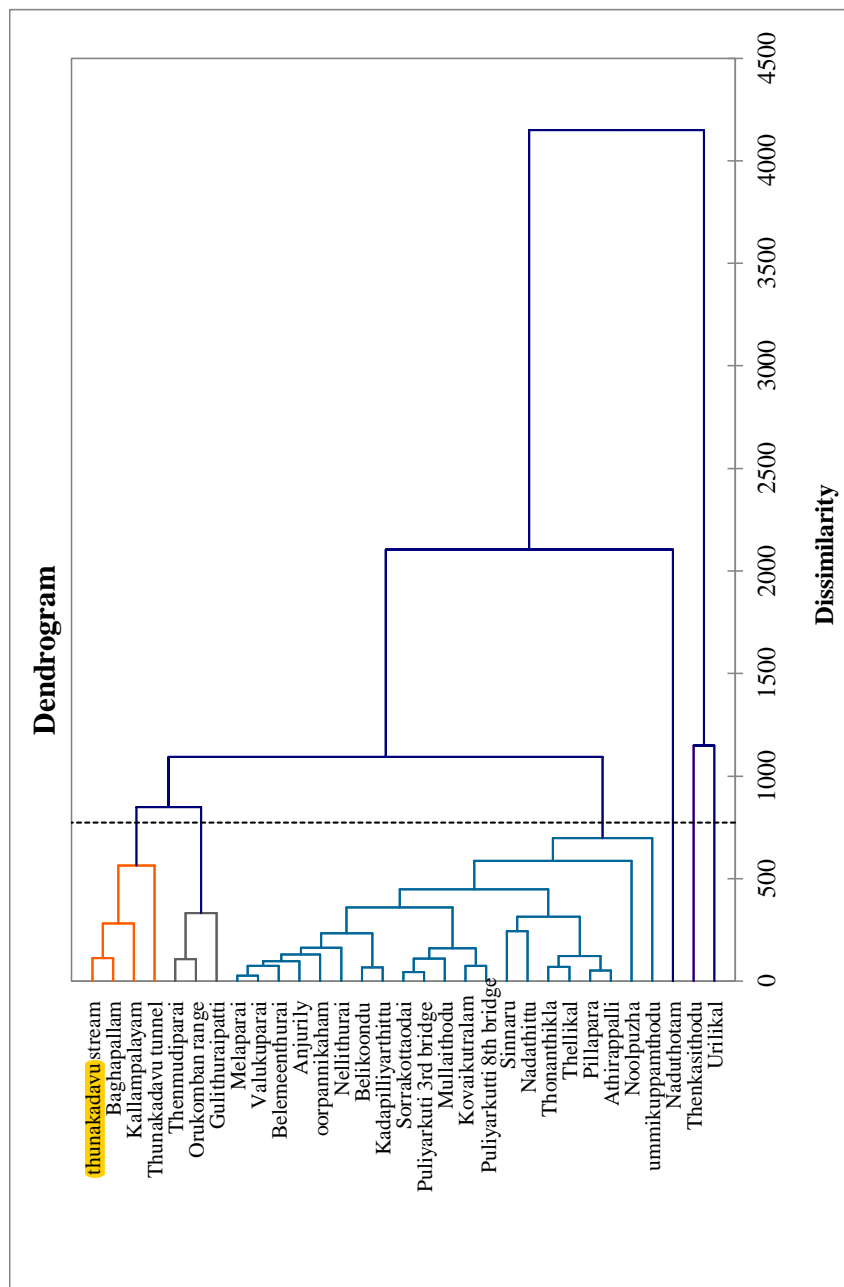

Fig. 6: Cluster dendrogram shows the dissimilarity between 31



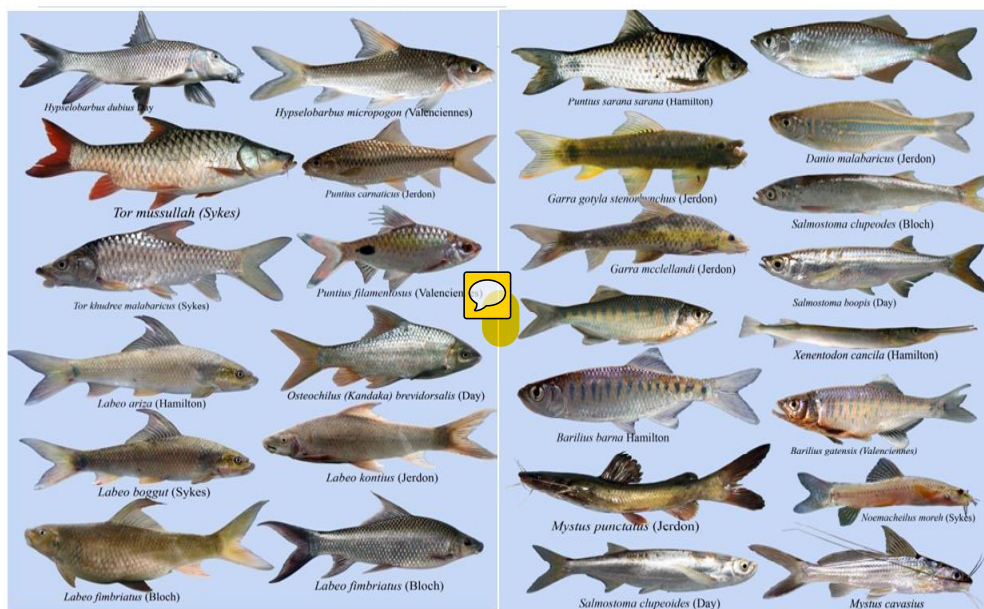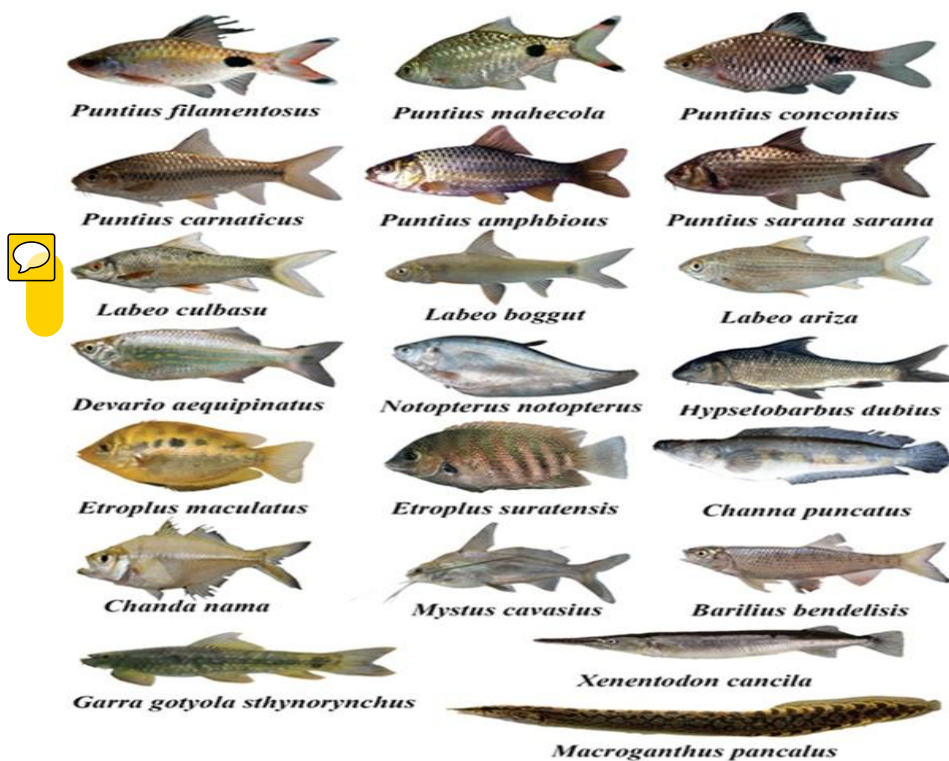

Fig. 7: Fishes collected from various water bodies of SWG
